1 **Cis-regulatory analysis of Onecut1 expression in fate-restricted retinal progenitor cells**

2

3 Sruti Patoori<sup>1,2</sup>, Nathalie Jean-Charles<sup>2</sup>, Ariana Gopal<sup>2</sup>, Sacha Sulaiman<sup>2</sup>, Sneha Gopal<sup>2,3</sup>, Brian  
4 Wang<sup>2</sup>, Benjamin Souferi<sup>2,4</sup>, Mark M. Emerson<sup>1,2,5</sup>

5

6 <sup>1</sup> Biology PhD Program, The Graduate Center, The City University of New York, New York, NY,  
7 10016

8 <sup>2</sup> Department of Biology, The City College of New York, The City University of New York, New York,  
9 NY, 10031

10 <sup>3</sup> Present Address: Doctoral program in Department of Chemical and Biological Engineering,  
11 Center for Biotechnology and Interdisciplinary Studies, Rensselaer Polytechnic Institute, Troy ,  
12 NY 12180

13 <sup>4</sup> Present Address: Touro College of Osteopathic Medicine, New York, NY 10027

14 <sup>5</sup> Biochemistry PhD Program, Graduate Center, City University of New York, NY 10016

15

16 \*Corresponding author: memerson@ccny.cuny.edu

17

18 Email addresses:

19

20 Sruti Patoori: spatoori@gradcenter.cuny.edu

21 Ariana Gopal: ariana.gopal@macaulay.cuny.edu

22 Sacha Sulaiman: ssulaim000@citymail.cuny.edu

23 Nathalie Jean-Charles: nathaliejcharles@gmail.com

24 Sneha Gopal: sneha.gopal94@gmail.com

25 Brian Wang: brianwangmhc@gmail.com

26 Benjamin Souferi: benjaminsouferi@gmail.com

27 Mark Emerson: memerson@ccny.cuny.edu

28

29

30

31

32

33 Running title: Retinal fate-restricted cis-regulatory elements

34

35

36

37 Keywords: retinal progenitor cells, multipotent, fate-restricted, cone photoreceptors, basic  
38 helix-loop-helix, chicken, electroporation

39

40

41

42

43

44  
45  
46  
47  
48  
49  
50  
51  
52  
53  
54  
55  
56  
57  
58  
59  
60  
61  
62  
63  
64  
65  
66  
67  
68  
69  
70  
71  
72  
73  
74  
75  
76  
77  
78  
79  
80  
81  
82  
83  
84

**Background:** The vertebrate retina consists of six major classes of neuronal cells. During development, these cells are generated from a pool of multipotent retinal progenitor cells (RPCs) that express the gene *Vsx2*. Fate-restricted RPCs have recently been identified, with limited mitotic potential and cell fate possibilities compared to multipotent RPCs. One population of fate-restricted RPCs, marked by activity of the regulatory element *ThrbCRM1*, gives rise to both cone photoreceptors and horizontal cells. These cells do not express *Vsx2*, but co-express the transcription factors (TFs) *Onecut1* and *Otx2*, which bind to *ThrbCRM1*. The components of the gene regulatory networks that control the transition from multipotent to fate-restricted gene expression are not known. This work aims to identify and evaluate cis-regulatory elements proximal to *Onecut1* to identify the gene regulatory networks involved in RPC fate-restriction.

**Method:** We identified regulatory elements through ATAC-seq and conservation, followed by reporter assays to screen for activity based on temporal and spatial criteria. The regulatory elements of interest were subject to deletion and mutation analysis to identify functional sequences and evaluated by quantitative flow cytometry assays. Finally, we combined the enhancer::reporter assays with candidate TF overexpression to evaluate the relationship between the TFs, the enhancers, and early vertebrate retinal development. Statistical tests included ANOVA, Kruskal-Wallis, or unpaired t-tests.

**Results:** Two regulatory elements, ECR9 and ECR65, were identified to be active in *ThrbCRM1*(+) restricted RPCs. Candidate bHLH binding sites were identified as critical sequences in both elements. Overexpression of candidate bHLH TFs revealed specific enhancer-bHLH interactions. *Nhlh1* overexpression expanded ECR65 activity into the *Vsx2*(+) RPC population, and overexpression of *NeuroD1/NeuroG2/NeuroD4* had a similar effect on ECR9. Furthermore, bHLHs that were able to activate ectopic ECR9 reporter were able to induce endogenous *Otx2* expression.

**Conclusions:** This work reports a large-scale screen to identify spatiotemporally specific regulatory elements near the *Onecut1* locus. These elements were used to identify distinct populations in the developing retina. In addition, fate-restricted regulatory elements responded differentially to bHLH factors, and suggest a role for retinal bHLHs upstream of the *Otx2* and *Onecut1* genes during the formation of restricted RPCs from multipotent RPCs.

85 **Introduction:**

86 The vertebrate retina is comprised of six main classes of neuronal cells and one class of glial  
87 cells, organized into three discrete nuclear layers and two plexiform layers. These  
88 morphologically and functionally diverse cells have been characterized in multiple vertebrate  
89 species to originate from multipotent retinal progenitor cells (RPCs) (Turner and Cepko, 1987;  
90 Fekete et al., 1994). The vertebrate retina is therefore a valuable model to study neuronal cell  
91 fate choice. The process of retinal development is highly conserved throughout the vertebrate  
92 subphylum, with regards to the birth order of the various cell types (Young, 1985; Wong and  
93 Rapaport, 2009) and the developmental regulatory networks involved. However, the gene  
94 regulatory networks (GRNs) that mediate the generation of specific restricted RPCs from  
95 multipotent RPCs are largely unknown, as are the networks that function in restricted RPCs to  
96 define their fate potential.

97

98 One restricted RPC type that has been identified across zebrafish, chick, and mouse models  
99 preferentially generates cones and horizontal cells (HCs) and has been identified in zebrafish  
100 and chick through regulatory elements associated with the *Thrb* and *Olig2* genes (Emerson et  
101 al., 2013; Hafler et al., 2012; Suzuki et al., 2013). For example, analysis in zebrafish and mouse  
102 RPCs showed that the same RPC can give rise to both cone and horizontal cell precursor cells  
103 (Hafler et al., 2012; Suzuki et al., 2013). Endogenous *Thrb* expression has been observed in  
104 *Otx2*-expressing early RPCs in the chick, suggesting that reporters driven by regulatory  
105 elements correspond to *in vivo* regulatory events in the retina (Trimarchi et al., 2008). While  
106 *Otx2* expression is involved in multiple cell fates during retinal development, it has been shown

107 that the combination of Otx2 and Onecut1 activates ThrbCRM1, which is a specific Thrb cis-  
108 regulatory element (CRE) active in cone/HC restricted RPCs (RPC[CH]) (Emerson et al., 2013).  
109 Loss-of-function mutations in Otx2 and Onecut1 affect early cone gene expression, cone  
110 number, cone type, and horizontal cell genesis (Nishida et al., 2003; Sapkota et al., 2014; Wu et  
111 al., 2013), suggesting that these transcription factors (TFs) are critical in the gene regulatory  
112 networks of ThrbCRM1 restricted RPCs.

113

114 The population of restricted RPCs marked by ThrbCRM1 have been shown to be molecularly  
115 distinct from multipotent RPCs. ThrbCRM1(+) RPCs downregulate multipotent RPC genes such  
116 as Vsx2 while Onecut1 is upregulated (Buenaventura et al., 2018). Onecut1 expression is further  
117 upregulated in the HC progeny of these cells but is downregulated in the cone photoreceptor  
118 progeny. However, it is not known how Onecut1 expression is activated in the ThrbCRM1 RPC  
119 population or what distinguishes it from other Onecut1(+) cell populations.

120

121 The regulatory module that connects Otx2 and Onecut1 to Thrb expression demonstrates the  
122 importance of both cis- and trans- regulatory elements in directing retinal cell fate. Cell fate  
123 specification and fate restriction require the combinatorial expression of multiple  
124 developmental transcription factors. As such, cell-type specific cis-regulatory elements can  
125 define the intermediate/restricted RPCs that may be difficult to identify through only the  
126 transient expression of developmental transcription factors that are often involved in the  
127 specification of multiple retinal cell types. These regulatory elements can be used to facilitate

128 imaging, lineage tracing, and molecular analysis, while also providing insights into the  
129 relationships between RPC populations.  
130  
131 We sought to identify the cis-regulatory elements upstream of *Onecut1* expression in cone/HC  
132 restricted RPCs and to determine the transcription factors that occupy these elements. To this  
133 end, we conducted a multi-step screen to identify *Onecut1*-associated non-coding DNA  
134 elements capable of driving reporter transcription in early retinal RPCs that give rise to cones  
135 and horizontal cells in the early embryonic chick retina. The candidate regulatory elements that  
136 emerged from the screen were then bioinformatically analyzed for transcription factor binding  
137 sites. Mutational analyses facilitated the functional evaluation of these predicted TF binding  
138 sites and overexpression experiments were used to determine the relationship between the  
139 predicted transcription factors and *Onecut1* expression. We identified two regulatory elements,  
140 ECR9 and ECR65, upstream of the *Onecut1* coding region. These both contain predicted binding  
141 sites for bHLH transcription factors, which are known to be functionally important for retinal  
142 development. We show that both of these elements require the predicted bHLH binding sites  
143 for their activity and that each element responds to distinct bHLH factors, the transcripts of  
144 which are enriched or present in the *ThrbCRM1* population. Finally, we show that *NeuroD1*,  
145 *NeuroG2*, and *NeuroD4* are sufficient to induce expression of *Otx2* and that all four TFs  
146 including *Nhlh1* are able to induce the activity of their corresponding regulatory elements in  
147 *Vsx2(+)* multipotent RPCs. Ultimately, this work further clarifies components of the gene  
148 regulatory network leading to the early retinal cell fates of cone photoreceptors, horizontal  
149 cells, and retinal ganglion cells.

150

151 **Results:**

152

153 ***Regulatory Element Identification:***

154

155 Two methods were employed to identify candidate cis-regulatory elements for Onecut1 (Figure  
156 1A,B). We first examined the intergenic region 5' of the chicken Onecut1 coding region and 3' of  
157 WDR72, as well as a short stretch of the intergenic region 3' of the Onecut1 coding region for  
158 evolutionarily conserved regions (ECRs). As not all cis-regulatory sequences are strongly  
159 conserved and as ECRBrowser (Ovcharenko et al., 2004) utilizes an older chick genome  
160 assembly, we also used chromatin accessibility as a means of candidate enhancer identification.  
161 Chick E5 retinæ were electroporated with ThrbCRM1::GFP and UbiqC::TdT, cultured for 18-22  
162 hours *ex vivo* and sorted into two populations: ThrbCRM1(+) cells, which were marked by both  
163 reporters and ThrbCRM1(-), which were marked by only TdT. These cells were then processed  
164 for ATAC-seq (Buenrostro et al., 2013), aligned against the galGal5 assembly and the data was  
165 visualized in the UCSC Genome Browser (Kent et al., 2002) to identify accessible chromatin  
166 regions (ACRs) as potential cis-regulatory elements. In total, we screened 98 ECRs and ACRs  
167 near Onecut1 (Additional File 1, Additional File 2) for their ability to drive reporter activity in  
168 the developing retina.

169

170 The first criterion of our screen was that the non-coding elements should be capable of driving  
171 reporter expression at E5 in the chick retina. To this end, we used a sensitive alkaline

172 phosphatase (AP) reporter assay. Each potential cis-regulatory region was amplified from chick  
173 genomic DNA and cloned into Stagia3 (Billings et al., 2010), a dual GFP and AP reporter vector.  
174 Retinae at E5 (HH26) were electroporated with the reporter construct along with CAG::mCherry  
175 as the co-electroporation control. These retinae were cultured for approximately 18-22h and  
176 then fixed before the AP stain was developed.

177

178 Previously identified Thrb reporters served as positive controls as they are known to be active  
179 in the E5 chick retina (Emerson et. al., 2013). The empty Stagia3 vector served as the negative  
180 control to demonstrate the baseline levels of transcription when no cis-regulatory element is  
181 present. At this time point, the majority of the candidate sequences tested did not drive  
182 reporter expression above the baseline level defined by the negative control. The active  
183 elements that were initially chosen based on evolutionary conservation were largely found to  
184 have open chromatin states in the within the ATAC-Seq datasets. All active cis-regulatory  
185 elements (Figure 1C, Additional File 3) were categorized as weak, moderate, or strong (Figure  
186 1B) and further examined for activity in cone/HC RPCs.

187

#### 188 ***Regulatory Activity within the Cone/HC Restricted RPC population:***

189 The second criterion of the screen was specificity to the population of fate-restricted early  
190 retinal RPCs that express Onecut1. The ThrbCRM1 element is active in the cone/HC restricted  
191 RPC population that expresses Onecut1 and Otx2 (Emerson et al., 2013). It has been previously  
192 reported that at 20 hours post-electroporation, 30% of ThrbCRM1(+) cells are in S-phase or  
193 G2/M (Buenaventura et al., 2018). Therefore, to determine which active elements drove

194 transcription in the same restricted RPC population, we co-electroporated the CRE::GFP  
195 reporter constructs with a ThrbCRM1::AU1 reporter into the chick retina at E5 and cultured  
196 overnight for approximately 20 hours. Retinal sections were stained for AU1 and GFP and  
197 qualitatively evaluated with regards to the specificity of each active enhancer to the Onecut1(+)  
198 restricted RPC population marked by the AU1 reporter (Figure 2, Additional File 4).

199

200 Many of the active CREs drove reporter expression in both the ThrbCRM1(+) and ThrbCRM1(-)  
201 populations, such as ECR42, ECR46 and ACR10-C (Additional File 4). ACR10-B (Additional File 4)  
202 activity appears to be distributed throughout the retina with no specific preference for  
203 ThrbCRM1(+) cells. Though the populations marked by these CREs overlap with our population  
204 of interest, they do not meet the criterion for specificity. Despite driving robust reporter  
205 expression in E5 chick retinae, ACR8 and ACR10-A (Figure 2, Additional File 4) appear biased  
206 towards ThrbCRM1(-) cells. It is difficult to assess the specificity ECR26, ECR29, and ECR35 to  
207 the ThrbCRM1 RPC population due to the weak activity of these enhancers (Additional Files 3  
208 and 4).

209

210 ACR2 does not exhibit activity in many cells, but most observed ACR2-positive cells are  
211 ThrbCRM1-positive (Figure 2). ECR65 appears to be highly active in ThrbCRM1-positive cells and  
212 was qualitatively the most specific enhancer to the ThrbCRM1 population. Likewise, ECR9  
213 activity is highly biased to the ThrbCRM1(+) RPC population but drives reporter activity in some  
214 ThrbCRM1(-) cells.

215



216 This assay indicates that the active enhancers display a wide range in specificity to the  
217 ThrbCRM1(+) cell population (Figure 2A, Additional File 4). ECR 65, ECR 9 and ACR 2 are the  
218 most promising candidates for a regulatory element that contains the regulatory information  
219 sufficient to promote Onecut1 expression in RPC[CH]s. ECR9 and ECR65 were further assessed  
220 for specificity to this restricted RPC cell population as they demonstrated more robust reporter  
221 expression than ACR2.

222

223 To quantify the specificity of each enhancer to the Onecut1(+) restricted RPCs, E5 chick retinae  
224 were electroporated with ECR9:: or ECR65::GFP reporters, ThrbCRM1::AU1, and a co-  
225 electroporation control. It was observed that 86.80% of ECR65(+) cells and 70.73% of ECR9(+)  
226 cells were also marked by ThrbCRM1 (Figure 2C). However, the ThrbCRM1(+) cell population  
227 does not consist of only RPCs. To determine the extent to which each enhancer was active in  
228 RPCs, E5 chick retinae electroporated with CRE::GFP constructs were pulsed with EdU for one  
229 hour prior to harvest. Approximately 30% of ECR9(+) and ECR65(+) cells are marked by EdU  
230 (Figure 2B, 2C), which is comparable to the proportion of EdU(+) cells within the ThrbCRM1 cell  
231 population (Buenaventura et al., 2018). Overall, these data provide evidence that the two  
232 regulatory elements ECR65 and ECR9 are active in ThrbCRM1 RPCs.

233

### 234 ***History of ECR 9 and ECR 65 Activity in Early-born Retinal Cell Types***

235 To further test if these regulatory elements label RPCs which produce cells with the same fates  
236 that develop from the ThrbCRM1(+) RPC population, we used a PhiC31 lineage tracing system.  
237 In this system, a cis-regulatory element is used to drive the expression of PhiC31, which can

238 activate a GFP responder vector through site-specific recombination to label cells with a history  
239 of cis-regulatory activity (Schick et al., 2019). We combined this lineage trace system with  
240 immunohistochemistry and cell-specific markers to determine which cell types develop from  
241 RPCs marked by ECR65 and ECR9. For comparison, and to demonstrate that not every active  
242 regulatory element lineage traces to the same populations at this time point, we also lineage  
243 traced ACR2 and ECR42.

244

245 It was observed that approximately 40% and 5.5% of ECR9-lineage traced cells were cone  
246 photoreceptor (Visinin) and horizontal cell (Lim1) fates, respectively. However, not all ECR9-  
247 lineage traced cells correspond to one of these two cells types. Some cells in the ECR9 lineage  
248 exhibit long axonal projections which appear to originate from GFP-positive cells in the  
249 innermost retina, suggesting that ECR9 is active at some point in the formation of retinal  
250 ganglion cells (RGCs). 4.37% of all GFP(+) cells were positive for pan-Brn3, suggesting the  
251 presence of RGCs arising from ECR9(+) cells. This may indicate that ECR 9 participates in the  
252 gene regulatory network responsible for generating cones, HCs, and RGCs. It is worth nothing  
253 that the ThrbCRM1 lineage-trace also includes a similar percentage of pan-Brn3(+) cells as  
254 ECR9, despite the lack of inner retinal projections seen with ThrbCRM1 and previous *in ovo*  
255 lineage tracing of ThrbCRM1 that detected only a small number of RGCs (Schick et al., 2019) .  
256 This is potentially due to the antibody's specificity – it may not mark all Brn3(+) RGC  
257 populations or it may be marking cells outside of the target population, including other inner  
258 retinal cells such as horizontal or amacrine cells.

259

260 Under the same experimental conditions, ECR65::PhiC31 marked overall fewer cells. However,  
261 the cell types with a history of ECR65 appeared biased towards the outer retina (Figure 3A).  
262 63.3% of GFP-positive cells were also marked by Visinin (Figure 3B) , confirming that ECR65-  
263 positive RPCs are capable of giving rise to cone photoreceptors. Surprisingly, very few ECR65-  
264 positive cells are marked by Lim1 despite the clear presence of GFP in inner retinal cells (Figure  
265 3A) and reported data that the ThrbCRM1 population gives rise preferentially to Lim1-positive  
266 HCs (Schick et al., 2019). To determine whether these cells may be RGCs or Isl1-positive HC, we  
267 stained with pan-Brn3 and Isl1. There were few pan-Brn3(+) GFP(+) cells. However, 5.9% of all  
268 GFP-positive cells were marked by Isl1. Lineage tracing of ThrbCRM1 yields similar results, with  
269 6.16% of GFP(+) cells also positive for Isl1 (Figure 3B).

270

271 ACR 2 does not lineage trace to very many cells, but is nearly exclusive to the outer retinal cells  
272 marked by Visinin, indicating that ACR2's role in retinal development is specific to  
273 photoreceptors, which are predicted to be cones at this timepoint. The lineage tracing of ECR  
274 42 illustrates that this enhancer's activity is not limited to the cone and horizontal cell fate and  
275 marks a much broader RPC population, as evidenced by the pan-retinal distribution of cells with  
276 a history of this regulatory element (Additional File 5).

277

278 At the conclusion of our screen, eighteen active regulatory elements were identified in the  
279 retina, two of which drove GFP reporter expression in a spatial pattern that excluded  
280 ThrbCRM1(+) cells. ACR 10.B was found to drive expression non-specifically throughout the  
281 retina and three elements, ECR 26; ECR 29; and ECR 35, drove expression too weakly to

282 determine their specificity. ECR 22 was found to mark a population that excludes cone  
283 photoreceptors (Gonzalez and Schick et. al., in preparation). ACR2, ECR9, and ECR65 best met  
284 the criteria for our screen. These elements are either specific or strongly biased to the  
285 ThrbCRM1(+) population, mark early retinal RPC cells expressing Onecut1, and are active in cells  
286 that give rise to three early retinal fates: cone photoreceptors; horizontal cells; and RGCs. As  
287 the lineage marked by ACR2 is largely specific only to a smaller population of cone  
288 photoreceptors, the remainder of this study is focused on evaluation of ECR 9 and ECR 65.

289

#### 290 ***Bioinformatic Analysis of Regulatory Element Sequences:***

291 Though reporter assays indicate that ECR65 and ECR9 drive transcription in the ThrbCRM1(+)  
292 population during the cone and HC specification windows in the chick retina, we do not know  
293 what role these regulatory elements play in the GRN that gives rise to cone photoreceptors and  
294 horizontal cells.

295

296 To determine which transcription factors bind to ECR 65 and ECR 9, we first attempted to  
297 identify conserved motifs present within the sequence. We used UCSC Blat (Kent, 2002) to find  
298 homologous sequences to the originally identified chick ECR 65 sequence from the golden  
299 eagle, barn owl, American alligator, thirteen-lined ground squirrel, northern treeshrew,  
300 chimpanzee, and human. ECR 65 is well-conserved among all of the avian species as well as the  
301 American alligator and is conserved between avians and mammals.

302

303 When searching for the 515 bp chick sequence in the mouse genome, UCSC BLAT returned a  
304 214 bp homologous stretch (Additional File 6A). This 214 bp mouse sequence contained a 58 bp  
305 stretch that did not align to the chick sequence. In contrast with chick ECR 65, which is wholly  
306 located within accessible chromatin, only 150 bp of the homologous mouse sequence are in  
307 accessible chromatin region. The accessible chromatin extends past the homologous sequence.  
308 Mouse ECR 65 (mECR65), as defined by chromatin accessibility, is 295 bp long (Additional File  
309 6A). In summary, ECR 65 demonstrated both a large sequence divergence and an apparent shift  
310 in chromatin accessibility between avian and mammalian species.

311

312 To assay this 295 bp mECR65 element for activity, we cloned it into the Stagia3 vector. When  
313 mECR65::GFP was electroporated into the chick retina at E5 along with ThrbCRM1::AU1,  
314 mECR65(+) cells were observed in the ThrbCRM1 population, which suggests that despite the  
315 sequence divergence, mECR65 has retained the regulatory information for activity in these  
316 cells. MEME motif analysis (Bailey and Elkan, 1994) of the various species-specific ECR 65  
317 sequences revealed that three motifs appeared conserved between avian and mammalian  
318 species (Additional File 6B). It is therefore likely the TF binding sites important for ECR 65  
319 activity are within the conserved Motifs 1, 5, and 2 (Figure 4).

320

321 The ECR 9 sequence is within accessible chromatin in both chick and mouse early retinal cells.  
322 The ECR 9 sequence used was cloned out of the mouse genome and as seen above, is able to  
323 drive transcription of a reporter in chick retinal cells during the peak of cone and horizontal cell  
324 development. Though the sequence tested is over 400bp long, only a ~270 bp span is conserved

325 between mouse and chick. Motif analysis of this enhancer through MEME returns seven motifs,  
326 of which six are conserved between birds and mammals (Figure 4, Additional Files 6C and 7).

327

328 ***Deletions and Mutations of Regulatory Element Sequences:***

329

330 To take an unbiased approach to determine which regions of ECR 65 are functional, five serial  
331 deletions of the chick ECR 65 sequence were tested for their ability to drive reporter activity  
332 (Figure 4, Additional File 7). The full-length/wild type version of ECR65 driving TdTomato was  
333 compared against the truncated versions driving GFP using flow cytometry. To ensure that any  
334 observed effects were not due to changes in the proximity between TF binding sites and the  
335 TATA box, all deletions were oriented such that the distance of all remaining sequence to the  
336 TATA box was preserved and these deletion constructs were compared to the full-length  
337 enhancer in the same orientation. To determine the effect of each deletion, we calculated the  
338 percent of GFP(+) cells relative to the amount of TdT(+) cells. WT ECR65::GFP marks about 56-  
339 65% as many cells as WT ECR65::TdT (Additional File 8). When these control values were  
340 normalized to 100%, ECR 65 Deletions 1-3 respectively marked 33.62%, 42.05% and 8.2% as  
341 many cells as the control WT ECR65::GFP (Figure 4A). When deletions were made on the other  
342 end of the regulatory element, GFP driven by ECR65 Deletion 4 or Deletion 5 respectively marks  
343 10.82% and 5.68% as many cells as WT ECR 65. Region 4 also encompasses MEME-predicted  
344 Motif 2. The severe loss of GFP expression upon deleting the 80 bp Region 4 suggests that  
345 Region 4 of ECR 65 contributes significantly to the activity of this regulatory element.

346

347 ECR 65 Motif 2 within Region 4 contains a potential binding site for a bHLH transcription factor.  
348 bHLH binding sites, known as E-boxes, typically follow the sequence CANNTG. Mutation of this  
349 potential E-box sequence resulted in a significant loss of enhancer activity (Figure 4C, Additional  
350 Files 7 and 8). This result suggests that the functional sequence within Region 4 may be this 6-  
351 bp motif, predicted by TOMTOM (Gupta et al., 2007) to bind the transcription factor  
352 NHLH1/NSCL1. Another mutation within Region 4 encompassing a predicted homeobox TF  
353 binding site resulted in some loss of GFP reporter activity (Figure 4C, Additional File 8).  
354  
355 A similar deletion strategy was used to investigate ECR 9 and reporter constructs were tested  
356 which removed the ECR9 sequences on either side of the MEME-identified motifs as well as  
357 Motif 1, 2, 3, and 7 (Figure 4, Additional File 7). As a control, we calculated the percent of  
358 GFP(+) cells relative to the amount of TdT(+) cells marked by full length versions of ECR9  
359 (Additional File 8). Once again, we ensured that deletions were orientated away from the TATA  
360 box and compared only to full-length ECR9 of the same orientation. Deletions of Region R,  
361 Motif 3, and Motif 7 did not result in a significant change to ECR9 activity. However, deletions  
362 of Motif 2, Motif1 and Region F all resulted in a decrease of ECR9 activity as compared to the  
363 full-length enhancer. Examination of the sequence for putative TF binding sites led to four  
364 predicted bHLH sites (Figure 4, Additional File 7). Site 1 and Site 2 are located in Region F and  
365 Motif 2, respectively. Sites 3 and 4 are both located within Motif 3. We hypothesized that if any  
366 of these sites were important for ECR9 function, mutation of one or more of them directly  
367 would result in a change in reporter expression. Mutation of Site 4, located within Motif 3,  
368 resulted in a 97.5% loss of ECR9 activity (Figure 4D, Additional Files 7 and 8).

369

370 ***Interactions with bHLH Transcription Factors:***

371 Our screen for cis-regulatory elements that could regulate Onecut1 expression in early  
372 restricted RPCs led to ECR9 and ECR65, which appear to be active in overlapping populations of  
373 early RPCs that give rise to distinct subsets of retinal cell types. The tested serial deletions and  
374 mutations suggest that both of these elements have critical regulatory input from bHLH family  
375 transcription factors. In addition to the bioinformatically predicted Nhlh1 binding site in ECR65,  
376 bulk RNA-seq indicated that NeuroD1, NeuroD4, NeuroG2, and Atoh7 transcripts were enriched  
377 in the ThrbCRM1(+) population (Buenaventura et. al., 2018) and therefore also candidates to  
378 interact with these two cis-regulatory elements. To explore these possibilities, each of the five  
379 bHLH factors was overexpressed under the control of the ubiquitous CAG promoter in the E5  
380 chick retina along with ECR65 and ECR9.

381

382 Under control conditions in which CAG did not drive any open reading frame, we calculated the  
383 percent of ECR9(+) or ECR65(+) cells out of the total electroporated population. Overexpression  
384 of either NeuroD1, NeuroG2, and NeuroD4 induced an increase in ECR9 reporter output, while  
385 Nhlh1 and Atoh7 did not. Confocal microscopy showed that the increase in ECR9(+) cells upon  
386 overexpression NeuroD1, NeuroG2, and NeuroD4 was predominantly in the inner retina (Figure  
387 5B). However, individual overexpression of these three bHLH factors is not sufficient to increase  
388 activity of the ECR9 Site 4 mutation (Figure 5D).

389



390 We detected no change to the ECR65 reporter output upon misexpression of NeuroD1,  
391 NeuroD4, NeuroG2, or Atoh7 (Figure 5A). However, overexpression of Nhlh1 led to a significant  
392 increase in the number of GFP(+) cells. Confocal microscopy data showed that the population  
393 marked by ECR65 appears to expand towards the inner retina upon Nhlh1 overexpression, with  
394 the morphology of some cells resembling multipotent RPCs marked by Vsx2 (Figure 5A, 5B).  
395 Furthermore, Nhlh1 overexpression was unable to rescue the loss of GFP activity seen in  
396 ECR65bHLH Mut1::GFP, suggesting that the site CATCAG within ECR65 is not only required for  
397 regulatory activity, but possibly mediates the interaction between ECR65 and Nhlh1 (Figure 5C).

398

399 Despite their effects on ECR9 and ECR65 activity, none of the four candidate bHLH factors were  
400 able to increase GFP reporter output driven by ThrbCRM1 (Figure 5A) or drive any changes in  
401 the spatial activity of the enhancer in the chick retina at E5 (Figure 5B). In addition, none of the  
402 bHLH genes were sufficient to ectopically induce ThrbCRM1 activity in the P0 mouse retina,  
403 suggesting that these genes were not sufficient to induce Onecut1 expression at this time  
404 (Additional File 9). These results suggest that either ECR9 and ECR65 activation may occur after  
405 ThrbCRM1 activation or that the interactions between the bHLH factors and enhancers are not  
406 sufficient to induce Onecut1 expression.

407

#### 408 ***Timeline of Regulatory Element Activity:***

409 ECR65::TdT and ECR9::GFP were electroporated with ThrbCRM1::GFP or ThrbCRM1::TdT  
410 respectively into retinas that were then cultured for 8 hours to assess whether the two  
411 regulatory elements activated at the same time as ThrbCRM1. ECR65, ECR9, and ThrbCRM1 are

412 all able to drive reporter expression 8 hours after electroporation. At this early time point,  
413 similar to the 18-22 hour time point, all ECR65(+) cells are ThrbCRM1(+). ECR9 activity at 8  
414 hours is also similar to its activity at 18-22 hours, as there are both ThrbCRM1(+) and  
415 ThrbCRM1(-) cells in this population (Figure 6A). Some of the ECR9(+) ThrbCRM1(-) cells in the  
416 inner part of the developing retina also appeared to be Vsx2(+) or EdU(+) (Figure 6B, 6C). These  
417 results indicate that onset of ECR9 and ECR65 activity is not later than or dependent on  
418 ThrbCRM1 activation.

419

#### 420 ***Molecular Events Upstream of ThrbCRM1 Activity:***

421 We then sought to determine whether any of the bHLH factors which impact ECR9 and ECR65  
422 activity affected one or more of the factors upstream of ThrbCRM1 such as Onecut1 and Otx2,  
423 or affected expression of the multipotent gene Vsx2. Overexpression of NeuroD1, NeuroD4, or  
424 NeuroG2 individually resulted in an increase of electroporated Otx2(+) cells (Figure 7A).  
425 Together with the increase in ECR9::GFP(+) cells, this would suggest that the newly GFP(+) cells  
426 are expressing Otx2 and indeed there is no change in the proportion of GFP(+) Otx2(+) cells  
427 upon overexpression of each bHLH factor (Figure 7A). We then examined whether this  
428 enhancer-marked population shared a relationship with the Vsx2(+) multipotent RPC  
429 population. Vsx2, shown to be largely absent in the ThrbCRM1(+) restricted RPC population,  
430 marks 48.8% of all electroporated cells after one day in culture while ECR9(+) Vsx2(+) comprise  
431 less than 1% of all electroporated cells. Overexpression of bHLH factors led to an increase in  
432 ECR9(+)Vsx2(+) cells. There was a trend for Vsx2(+) cells within the electroporated population  
433 to decrease upon bHLH overexpression but this was not statistically significant (Figure 7A).

434

435 Overexpression of Nhlh1 does not result in any change to electroporated Otx2(+) cells nor to  
436 those cells positive for both Otx2 and ECR65::GFP. Staining with Vsx2 confirmed that there is an  
437 increase in ECR65(+) Vsx2(+) cells upon overexpression of Nhlh1 (Figure 7B), as suggested by  
438 the data from Figure 5, though the overall percent of Vsx2(+) cells out of the total  
439 electroporated population does not change. This result may indicate that Nhlh1 overexpression  
440 induces some ECR65 activity within the Vsx2(+) cell population.

441

442 Onecut1 staining was used to qualitatively assess the relationship between the enhancers  
443 ECR65 and ECR9, the four candidate bHLH factors, Vsx2, and Onecut1. ECR9(+) Onecut1(+) cells  
444 appear biased towards the outer retina, where ECR9(+) ThrbCRM1(+) cells are also observed  
445 (Figure 2A), whereas ECR9(+) Vsx2(+) cells are more common towards the inner retina (Figure  
446 7C). This does not change when NeuroD1, NeuroD4, or NeuroG2 are overexpressed. However,  
447 it appears that many of the strongly GFP-pos cells that appear in the inner retina in response to  
448 bHLH overexpression are neither Onecut1(+) nor Vsx2(+).

449

450 We observed that under control conditions ECR65 activity overlaps greatly with Onecut1  
451 expression and there are very few ECR65(+) cells which express both OC1 and Vsx2 (Figure 7D).  
452 However, ECR65(+) cells which express Vsx2 but not Onecut1 appeared more frequently upon  
453 Nhlh1 overexpression.

454

455 ***Relationship Between bHLH Factors and Early-born Retinal Cell types***

456 We investigated the possibility of these factors affecting retinal cell types developing from E5 to  
457 E7. Previously it has been shown that overexpression of *Onecut1* in the postnatal mouse retina  
458 can induce an increase in cones and horizontal cells while suppressing the rod photoreceptor  
459 fate (Emerson et al., 2013). Here, we overexpressed the four candidate bHLH factors, cultured  
460 for two days to mirror the lineage tracing experiments, and stained for the same cell-type  
461 specific markers (Additional File 10) to determine whether these bHLHs play a role in the  
462 development of the cell types marked by the lineage tracing of ECR65 and ECR9. The lineage  
463 tracing of ECR9 in conjunction with the data from overexpression of *NeuroD1*, *NeuroD4*, and  
464 *NeuroG2* suggests that these one or more of these transcription factors may play a role in the  
465 development of *Lim1(+)* horizontal cells or RGCs. However, no conclusive increase of these cell  
466 types was observed upon bHLH overexpression. Consistent with previously reported data (Li et  
467 al., 1999) overexpression of *Nhlh1* was not sufficient to induce an increase in *Isl1(+)* cells. Lastly,  
468 none of the four candidate bHLH factors had an effect on photoreceptors marked by *Visinin*.

469

#### 470 **Discussion:**

471 The work presented here is intended to serve as a step towards understanding the distinction  
472 between cell fate multipotency and restriction. The expression of multipotent RPC genes such  
473 as *Vsx2* and genes such as *Onecut1* that mark the *ThrbCRM1(+)* fate-restricted RPC population  
474 appear to be mutually exclusive (Buenaventura et al., 2018). It is not understood what gene  
475 regulatory networks are involved in the establishment of these two populations. We therefore  
476 sought to identify cis-regulatory elements specific to the RPC[CH] population that function  
477 upstream of *Onecut1* and may be involved in the restriction process.

478

479 Our large-scale, multi-step screen for regulatory elements resulted in the identification of three  
480 regulatory elements that drove a spatial expression pattern biased to the cone/HC restricted  
481 RPC population. In addition to ECR9 and ECR65, we found multiple regulatory elements which  
482 drove expression in non-specific expression patterns and two which completely excluded the  
483 population of interest. These two regulatory elements, ACR8 and ACR10-A, may be involved in  
484 generation or maintenance of the multipotent RPC population that gives rise to a broader range  
485 of mature cell types as well as the restricted RPC populations. It may also be that the more  
486 broadly-acting or ThrbCRM1(-) elements from this screen require further genomic context to  
487 act specifically in Onecut1(+) restricted RPCs. Our reporter assay is demonstrably effective in  
488 finding minimal elements that can drive specific spatiotemporal expression patterns, but we  
489 cannot be certain that we replicate the genomic function of every assayed element given the  
490 importance of chromatin state and the surrounding sequences. Our assay does capture some  
491 aspects of genomic context as every active element is found within accessible chromatin  
492 regardless of sequence conservation. Highly conserved elements located within closed  
493 chromatin in E5 chick retinal cells were not found to be active. Despite this, differential  
494 chromatin accessibility may not be a strong indicator of enhancer specificity in cell populations  
495 at the same developmental time point. ECR65 in particular is accessible in both ThrbCRM1(+)  
496 and ThrbCRM1(-) cells, yet under normal conditions is only active in the ThrbCRM1(+)  
497 population, demonstrating that appropriate combinations of transcription factors are still  
498 required to confer specific activity to regulatory elements.

499

500 The regulatory elements ECR9 and ECR65 mark distinct but overlapping populations of  
501 developing chick retinal cells from E5-E6, which includes RPCs (Figure 2). ECR65 has also been  
502 identified through DNaseI hypersensitivity in the mouse retina as “OC1 A” (Nadadur et al.,  
503 2019) but has not been further characterized. Here, we report that the ECR65(+) population  
504 overlaps almost entirely with the ThrbCRM1(+) population of cone/HC RPCs (Figure 2) and  
505 excludes the Vsx2(+) multipotent RPC population (Figure 7). By combining bioinformatic  
506 analyses of the active enhancer sequences with functional tests and previously published RNA-  
507 seq data, we were able to connect the activity of ECR9 and ECR65 to bHLH transcription factors.  
508  
509 The overexpression assays demonstrate specificity in the interactions between the four  
510 candidate bHLH factors and the two candidate enhancers. The involvement of these  
511 transcription factors in retinal development and specifically in retinal cell fate choice has also  
512 been well-documented (Cepko, 1999; Hatakeyama and Kageyama, 2004; Dennis et al., 2019).  
513 For example, Nhlh1 RNA is known to be present in Isl1(+) RGCs (Li et al., 1999) and has been  
514 observed in scRNA-seq from chick retinal cells to mark a cone photoreceptor subtype (Ghinia-  
515 Tegla et al., 2019). When overexpressed alongside both candidate enhancers, Nhlh1 is only able  
516 to affect the activity of ECR65 (Figure 5A, 5B) which lineage traces to an Isl1(+) population  
517 (Figure 3). However, further investigation is required to identify and characterize Nhlh1(+)  
518 developing cone photoreceptors and determine whether they develop from the ECR65(+)  
519 population. Similarly, NeuroG2 has been found to be important for RGC genesis (Hufnagel et al.,  
520 2010; Maurer et al., 2018) and involved in HC fate choice (Akagi et al., 2004). This role may

521 underlie its interaction with ECR9 (Figure 5A, 5B), which lineage traces to horizontal cells and  
522 morphologically characteristic RGCs (Figure 3).

523

524 The ECR9(+) population also distinguishes itself with a subpopulation that does not overlap with  
525 ThrbCRM1 activity. However, this ECR9 (+) ThrbCRM1(-) population that includes RPCs also  
526 does not overlap strongly with the multipotent Vsx2(+) population(Figure 6, Figure 7). Though  
527 NeuroD1, NeuroG2, and NeuroD4 were considered candidate TFs largely due to their  
528 enrichment in the ThrbCRM1(+) population (Buenaventura et. al., 2018), our data did not  
529 indicate that overexpression of individual candidate bHLH factors affected ThrbCRM1 activity  
530 on the timescale that we examined. Both the quantitative and qualitative assessment along  
531 with the visible increase in both Otx2(+) and ECR9(+) cells in the inner retina suggest that  
532 NeuroD1, NeuroD4, and/or NeuroG2 mediate ECR9 activity in a population of Otx2(+) cells  
533 distinct from the ThrbCRM1(+) restricted RPC population.

534

535 It has been hypothesized that an intermediate restricted RPC, marked by ThrbICR, gives rise to  
536 ThrbCRM1(+) restricted RPCs (Schick et al., 2019). Lineage tracing of ThrbICR, which is bound  
537 by NeuroD1 (Liu et al., 2008), shows that the cells marked by that element can give rise to RGCs  
538 as well as cones and horizontal cells (Schick et al., 2019). In conjunction with the ECR9 lineage  
539 tracing data and NeuroD1 overexpression data, ECR9 activity in cells which are neither  
540 ThrbCRM1(+) nor Vsx2(+) suggests that ECR9 could also label this intermediate population,  
541 referred to as RPCs[CHG] (Figure 8A).

542

543 The regulatory elements uncovered in this and previous screens can therefore be used to mark  
544 distinct developing populations in the early vertebrate retina. OC1 ECR65 and ThrbCRM1 are  
545 both active in the restricted RPC[CH], while OC1 ECR9 and ThrbICR activity may be marking the  
546 hypothesized RPC[CHG] which is distinct from multipotent RPCs characterized by the activity of  
547 VSX2 ECR4 (Buenaventura et al., 2018). Other elements found in the screen, such as ACR2  
548 (Figure 2, Additional File 5) and ECR22 (Gonzalez and Schick et. al., in preparation), may be  
549 more specific to either the cone photoreceptor precursors or horizontal cell precursors,  
550 respectively, from the ThrbCRM1 lineage (Figure 8A). Though ECR9(+) and ECR65(+) cell  
551 populations overlap with each other and other CREs such as ThrbCRM1 and potentially ThrbICR,  
552 the two enhancers characterized here are unique in their responses to the bHLH factors  
553 described above. We hypothesize that the interactions between ECR9 and ECR65 and their  
554 respective bHLHs play a role in the transition from multipotent RPCs to the fate-restricted  
555 RPC[CH] population (Figure 8B). It may be that one or more of the bHLH factors shown to  
556 interact with ECR9 may play a role in coordinating Vsx2 downregulation and activation of  
557 Onecut1 expression and ThrbCRM1 activity (Figure 8B).

558

559 While we have not determined which factor(s) among NeuroD1, NeuroD4 and NeuroG2  
560 interact with ECR9 *in vivo*, the ability of all three factors to increase ECR9 activity is consistent  
561 with a previous study demonstrating their functional redundancy during retinogenesis (Akagi et  
562 al., 2004). As ECR9 has multiple putative E-box sites, it may be that some combination of two or  
563 all three factors is required for the correct regulatory output of this enhancer. Of the ECR9  
564 bHLH sites, Sites 2-4 all vary in sequence but all three sites and their flanking sequences are



565 highly conserved between mouse, chick and human (Additional File 7). It is also worth noting  
566 that while the ECR65 bHLH site shares the same sequence as ECR 9 Site 3, the two enhancers  
567 still differ in their ability to respond to Nhlh1 overexpression. This may be due to the  
568 differences in their flanking sequences. Previous work has shown that some bHLH factors are  
569 able to utilize each other's binding sites (Mao et al., 2013) and that the sequence flanking the  
570 core E-box may also be important for binding affinity (Gordân et al., 2013).

571  
572 Our results do not suggest that any of these bHLH factors individually are capable of inducing or  
573 suppressing any of the early-born cell fates in the chick retina. Previous studies using *Xenopus*  
574 were able to yield an increase in photoreceptors upon overexpression of NeuroD1 and  
575 NeuroD4 (Wang and Harris, 2005). In chick, NeuroD1 has been reported to induce more  
576 photoreceptors when virally overexpressed in the chick retina at E2 and cultured until E8.5/E9  
577 (Yan and Wang, 1998). Our lack of a similar result may be due to differences in the  
578 experimental timepoints, as our experimental conditions included a maximum culture time of  
579 48 hours. Though we were also not able to induce horizontal cell or RGC fates, it may be  
580 because the overexpressed factors require the co-expression of other TFs in order to specify or  
581 induce particular cell fates. For instance, the prediction of a homeobox TF binding site so close  
582 to the bHLH binding site in ECR65 may suggest that both Nhlh1 and a homeobox factor are  
583 required to induce the cell fates observed from lineage tracing ECR65. Future studies are  
584 required in which bHLH factors are overexpressed in combination with each other and with  
585 homeobox factors to determine which factors are sufficient to drive early retinal cell fates in  
586 chick.

587

588 **Conclusions:** This study examined the upstream regulatory events of the *Onecut1* gene that  
589 occur in chick RPCs. Guided by both sequence conservation and chromatin accessibility, we  
590 identified two regulatory elements near the *Onecut1* gene, ECR9 and ECR65, that are  
591 preferentially active in *Onecut1*-expressing *Thrb*CRM1(+) RPCs. We find that both of these  
592 elements are predicted to contain bHLH transcription factor binding sites, which are required  
593 for activity of these elements. Overexpression of specific bHLH members leads to ectopic  
594 activity of ECR9 and ECR65 in *Vsx2*(+) RPCs. These bHLH factors are able to upregulate  
595 endogenous *Otx2* expression, a protein normally expressed in fate-restricted RPCs. Taken  
596 together, these results suggest a role for bHLH factors in promoting the formation of fate-  
597 restricted RPCs from multipotent RPCs through the activation of *Onecut1* and *Otx2*.

598

599 **Abbreviations:**

600 GRN – gene regulatory network

601 RPC – retinal progenitor cell

602 HC – horizontal cell

603 RPC[CH] – restricted retinal progenitor cell that gives rise to cones, horizontal cells

604 RPC[CHG] – restricted retinal progenitor cell that gives rise to cones, horizontal cells, retinal  
605 ganglion cells

606 CRE – cis-regulatory element

607 TF – transcription factor

608 GFP – green fluorescent protein

609 TdT – TdTomato

610

611 **Declarations:**

612 **Acknowledgements:**

613 Diego Buenaventura provided guidance with the bioinformatic analyses and Sean McCaffery

614 generated the lineage tracing plasmids for ECR9 and ECR42. Miruna Ghinia-Tegla, Estie Schick,

615 Xueqing Chen and the rest of the Emerson Lab provided valuable feedback. The Lim1 and Isl1

616 antibodies developed by TM Jessell and S. Brenner-Morton and the Visinin antibody developed

617 by C. Cepko and S. Bruhn were obtained from the Developmental Studies Hybridoma Bank,

618 created by the NICHD of the NIH and maintained at The University of Iowa, Department of

619 Biology, Iowa City, IA 52242. Jeffrey Walker and Jorge Morales provided assistance with flow

620 cytometry and confocal microscopy, respectively.

621

622 **Funding:**

623 Support was provided to ME by a National Science Foundation grant 1453044 and a Sloan

624 Foundation Junior Faculty Research Award in Science and Engineering. BS was supported by

625 NSF DBI 1156512 to CCNY and core facility usage by 3G12MD007603-30S2 to CCNY.

626

627 **Availability of Data and Materials:**

628 ATAC-seq data generated from chick retinal cells has been submitted to GEO as data set

629 XXXXXX and will be available upon publication. ATAC-seq data generated from mouse retinal

630 cells is not currently available as it is part of another study but can be made available upon  
631 request.

632

633 **Authors Contributions:**

634 ME and SP generated the ATAC-seq libraries, planned and conducted experiments and wrote  
635 the manuscript. NJC led the initial screen shown in Figure 1 and Additional Files 1 and 2. AG, SG,  
636 BW, and BS generated plasmids and processed tissue for Figures 1 and 2 and Additional Files 1  
637 and 2. BS also generated mutagenized plasmids for Figure 4. SS generated plasmids and  
638 processed tissue for Figures 4 and 5.

639

640 **Ethics approval and consent to participate**

641 The City College of New York Institutional Animal Care and Use Committee approved all animal  
642 procedures under protocol 932.

643

644 **Competing interests**

645 The authors declare that they have no competing interests

646

647 **Consent for publication**

648 Not applicable

649

650 **Methods:**

651 **Animals**

652 Fertilized chick eggs were acquired from Charles River and stored at 16 °C room for a maximum  
653 of ten days. Embryonic days were counted from E0 when eggs were moved to a 38 °C  
654 humidified incubator for five days.

655

#### 656 **ATAC-seq**

657 ATAC-seq libraries were collected and amplified as outlined by Buenrostro et al., 2013. Mouse  
658 retinas were collected from embryonic day 12.5 (plug morning equal to time 0.5) embryos, and  
659 dissociated using manual douncing. Libraries were analyzed for quality control on Bioanalyzer  
660 and Qubit and then sequenced at a depth of 37.5 million reads per sample. Sequenced libraries  
661 were prepared for analysis using FASTQGroomer (Blankenberg et al., 2010) on default settings  
662 and then analyzed using Bowtie for Illumina (Langmead et al., 2009) with default settings  
663 except -X 2000 and -m 1, through the usegalaxy.org (Afgan et al., 2018) web platform.  
664 Resulting SAM files were converted to the BAM format (Li et al., 2009) and the BigWig (Kent et  
665 al., 2010) format.

666

#### 667 **Electroporation**

668 Retinae were electroporated ex vivo as previously described (Schick et al., 2019). CAG::reporter  
669 plasmids were used at a concentration of 0.1ug/uL with the exception of CAG::mCherry, which  
670 was used at a concentration of 0.04 ug/uL. Reporter plasmids under the control of a tissue-  
671 specific enhancer (ex: ThrbCRM1, ECR9, ACR2, etc) were used at a concentration of 0.16 ug/uL  
672 For lineage tracing experiments, all plasmids (recombinase, responder plasmid, co-  
673 electroporation control) were used at a concentration of 0.1 ug/uL. Recombinase and

674 responder plasmids are described in Schick et. al., 2019. Plasmids used in initial identification  
675 screen for cis-regulatory elements used miniprep scale DNA purification (Zymo Research, D4020  
676 or 5 prime/Eppendorf, FastPlasmid kit) and all subsequent experiments used midiprep scale  
677 DNA purification (Qiagen, 12145 or 12243).

678

### 679 **Alkaline Phosphatase Staining**

680 Retinas were harvested from culture and fixed in 4% paraformaldehyde (PFA), washed 3X in  
681 PBS, and incubated in 1 mL NTM (pH 9.5) buffer for 15 minutes while shaking at a low speed  
682 before addition of 1mL NTM with NBT(0.25 mg/mL) and BCIP (0.125 mg/mL). Retinae were  
683 incubated with the AP substrates in the dark for 2-3 hours until the positive control was well-  
684 stained.

685

### 686 **Immunohistochemistry**

687 Retinas were harvested from culture, prepared for cryosectioning, and 20 micron vertical  
688 sections were collected as outlined in Schick et al., 2019. Sections were incubated for 10  
689 minutes in 0.1% Tween (VWR, 97062-332) in PBS (PBT) and then blocked for 1 hour in 5% serum  
690 (Jackson ImmunoResearch, Donkey - 017-000121, Goat - 005-000-121) in PBT at room  
691 temperature prior to incubation with primary antibodies overnight at 4 C. Sections were  
692 washed 3X with PBT, prior to blocking at room temperature for 30 min and then incubated with  
693 secondary antibodies overnight at 4 C. DAPI was added at 1 ug/uL in PBT while washing off the  
694 secondary antibodies. Sections were then mounted using Flouromount-G (Southern Biotech,  
695 0100-01) and coverslips (VWR, 48393-106). Primary antibodies are listed in the table below. All

696 secondary antibodies were obtained from Jackson ImmunoResearch and suitable for multiple  
697 labelling. All Alexa-conjugated secondary antibodies were used at dilution of 1:400 and Cy3-  
698 conjugated secondary antibodies were used at a dilution of 1:250 from secondary antibody  
699 stocks in 50% glycerol.

| <b>Antibody; dilution</b> | <b>Vendor</b> | <b>Catalog number</b> |
|---------------------------|---------------|-----------------------|
| Chick anti-GFP 1:2000     | Abcam         | ab13970               |
| Rabbit anti-GFP 1:1000    | Invitrogen    | A6455                 |
| Mouse anti-AU1 1:2000     | Enzo          | ENZ-ABS135-0200       |
| Chick anti-Bgal 1:1000    | Abcam         | ab9361                |
| Rabbit anti-RFP 1:250     | Rockland      | 600-401-379           |
| Mouse anti-Onecut1 1:200  | Santa Cruz    | Sc-376308             |
| Goat anti-Otx2 1:500      | R&D           | AF1979                |
| Sheep anti-Vsx2 1:200     | Ex Alpha      | x1180p                |
| Mouse anti-Visinin 1:250  | DHSB          | 764-s                 |
| Mouse anti-Lim1 1:15      | DHSB          | 4F2-C                 |
| Mouse anti-Isl1 1:50      | DHSB          | 39.3F7                |
| Mouse anti-panBrn3 1:100  | Santa Cruz    | Sc-390781             |

700

## 701 **Microscopy and Cell Counting**

702 Images of whole AP-stained retinas were acquired using a Zeiss Axiozoom V16 microscope with  
703 a 1X objective and Zen 2 Blue 2011 software. All confocal microscopy images were acquired  
704 using a Zeiss LSM 710 inverted confocal microscope with a 40x oil immersion objective, 488nm  
705 laser, 561 nm laser, 633 nm laser, 405 nm laser, and Zen Black 2015 21 SP2 software at a  
706 resolution of 1024 x 1024, acquisition speed of 6 and averaging number of 2. For all confocal  
707 images shown, Z-stacks consisting of 8-12 Z planes were collected and are shown as maximum  
708 intensity projections. Cells were counted in the Fiji (Schindelin et al., 2012) distribution of  
709 ImageJ, using the Cell Counter plug-in developed by Kurt De Vos. In the lineage-tracing  
710 experiments and for the EdU assay, all GFP(+) cells which co-localized with DAPI were counted

711 first and cells positive for EdU or for cell-specific markers such as Visinin were counted among  
712 this population. In both instances, multiple images per retina were analyzed if necessary to  
713 reach at least 45-50 GFP(+) cells. Brightness and contrast were adjusted uniformly across each  
714 image in Affinity Designer vector editor (Serif [Europe] Ltd).

715

#### 716 **EdU Pulse and Detection**

717 5  $\mu$ L of 10mM EdU solution was added to 1 mL of culture media during the last hour of  
718 incubation before retinas are harvested as described above. EdU was detected using the Click-iT  
719 Plus EdU Kit for Imaging (Invitrogen, C10640). The tissue was first incubated for 15 minutes in  
720 0.1% Tween in PBS at room temperature before incubating with the EdU Reaction Cocktail for  
721 30 min in the dark at room temperature. The EdU Reaction Cocktail was then removed with 3  
722 washes of PBT prior to antibody staining.

723

#### 724 **Deletions and Mutagenesis**

725 Deletions or truncated versions of regulatory element sequences were generated through the  
726 use of PCR primers that began internally within the sequence and excluded the portions of the  
727 sequence to be deleted. Mutant regulatory element sequences were generated using overlap  
728 extension PCR, in which primers included short sequence mismatches at potential TF binding  
729 sites. A second set of primers encompassed the ends of the regulatory element sequence and  
730 the restriction sites within the plasmid template for easy cloning of the mutant sequence into  
731 the Stagia3 reporter vector. Site 3 and Site 4 within ECR9 were mutated to the sequences  
732 “TTAGAC” and “AGGCCA”. The bHLH site within ECR65 Region 4 was also mutated twice, to the



733 sequence “CTGATGAATGGCG” to include the E-box site, 4 bp upstream and 3 bp downstream  
734 and to the sequence “TTTCCCAAAG” to include the E-box site and 4 bp upstream. (Figure 4,  
735 Additional File 8).

736

### 737 **MEME-suite**

738 To identify conserved motifs within ECR65, we used MEME with settings to find a maximum of  
739 12 motifs, with a width of 6-50 bp each and 2-9 sites per motif. For ECR9, we used settings to  
740 find a maximum of 7 motifs, with a width of 6-50 bp each and 2-8 sites per motif. The output  
741 from MEME was then used as input for TOMTOM under default settings.

742

### 743 **Multiple Sequence Alignments**

744 The alignments between the chick, mouse, and human sequences for ECR9 and ECR65  
745 (Additional File 7) were produced in Clustal Omega (Madeira et al., 2019) version 1.2.4 with  
746 default settings.

747

### 748 **Plasmids**

749 Plasmids containing coding sequences of candidate TF genes were obtained from Transomics.  
750 Mouse Nhlh1 (Clone ID: BC051018) and mouse NeuroD4 (Clone ID: BC054391) were cloned  
751 using EcoR1 to insert into a modified pCAG vector that allows for EcoR1 flanked insert cloning  
752 (Emerson et al., 2013) while mouse NeuroD1 (Clone ID: BC018241), human NeuroG2 (Clone ID:  
753 BC036847) and human Atoh7 (Clone ID: BC032621) were cloned using a combination of EcoR1  
754 and Not1 (NeuroD1, NeuroG2, Atoh7) into pCAG::EGFP (Matsuda and Cepko, 2004) such that

755 each coding sequence is under the control of the CAG promoter. The following plasmids were  
756 previously reported: CAG::OC1, ThrbCRM1::GFP, ThrbCRM1::AU1 plasmids (Emerson et al.,  
757 2013); CAG::iRFP (Buenaventura et al., 2018); Bp::PhiC31 lineage tracing and CAaNa::GFP  
758 responder plasmids (Schick et al., 2019); UbiC::TdTomato (Rompani and Cepko, 2008); and  
759 TdTomato reporter plasmid (Jean-Charles et al., 2018). The CAG::mCherry and CAG::nucBgal  
760 plasmids were constructed by Takahiko Matsuda and reported in (Wang et al., 2014) and  
761 obtained from the Cepko lab, respectively. The ThrbCRM1::TdTomato plasmid was made by  
762 ligating a Not1/EcoR1 fragment from ThrbCRM1::GFP into the TdTomato reporter plasmid  
763 (Jean-Charles et al., 2018). Candidate Onecut1 cis-regulatory elements were amplified from  
764 chick or mouse genomic DNA with Herculase II polymerase (Agilent, 600677-51), treated for 10-  
765 30 minutes with Taq polymerase (Qiagen, 201203) to generate Adenine overhangs, and ligated  
766 into PGemTeasy (Promega, A1360). Inserts were sequence verified by Sanger sequencing  
767 (Genewiz) and moved into Stagia3 after EcoR1 digestion. In cases where elements contained  
768 EcoR1 sites, the original sequences used to amplify candidate elements were used to generate  
769 modified oligos with Xho1, Sal1, or Mfe1 restriction sites to allow for PCR-amplification of  
770 elements from the verified PGemTeasy clones and subsequent insertion into an appropriately  
771 digested Stagia3 plasmid. As candidate elements could be inserted into Stagia3 in two  
772 orientations, for some elements both possible orientations were tested.

773

#### 774 **Dissociation and Flow Cytometry**

775 Upon harvest, retinae were dissociated into single cells as described in Schick et al, 2019 using  
776 papain (Worthington, LS003126) and an activation solution of L-cysteine (VWR, 97063-478) and

777 10mM EDTA at 37 C. 10% FBS (ThermoFisher, A3160602) solution in DMEM (Life Technologies,  
 778 11995-073) was used to stop the dissociation .Cells were further digested with DNaseI (Sigma,  
 779 4536282001) and subsequently washed in DMEM prior to fixing in 4% PFA. Dissociated cells  
 780 were then analyzed on a BD LSRII machine using the 488nm, 561nm, and 633nm lasers. The  
 781 collected data was analyzed using FlowJo version 10.4.2.

782

### 783 **Statistical tests**

784 Statistical tests were conducted using GraphPad Prism. Data sets were tested for normality  
 785 (Shapiro-Wilk) prior to ANOVA, Kruskal-Wallis, or t-tests. Significant Kruskal-Wallis or ANOVA p-  
 786 values were followed up with Dunn’s or Dunnett’s post hoc test, respectively.

| Figure           | Exp. Condition      | Dunnett p-value | Dunn p-value | Unpaired t-test |
|------------------|---------------------|-----------------|--------------|-----------------|
| <b>Figure 4a</b> | ECR65 Deletion 3    |                 | 0.0011       |                 |
|                  | ECR65 Deletion 4    | < 0.0001        |              |                 |
|                  | ECR65 Deletion 5    | < 0.0001        |              |                 |
| <b>Figure 4c</b> | ECR9 Deletion F     |                 |              | 0.0016          |
|                  | ECR9 Deletion 1     |                 |              | 0.006           |
|                  | ECR9 Deletion 2     |                 |              | 0.0025          |
| <b>Figure 4b</b> | ECR65 bHLH Mut A    | < 0.0001        |              |                 |
|                  | ECR65 hb Mut        | 0.0242          |              |                 |
| <b>Figure 4d</b> | ECR9 site 3 Mut     | 0.0007          |              |                 |
|                  | ECR9 site 4 Mut     | 0.001           |              |                 |
| <b>Figure 5a</b> | ECR65 + Nhlh1       | 0.046           |              |                 |
|                  | ECR9 + NeuroD1      | 0.0019          |              |                 |
|                  | ECR9 + NeuroG2      | 0.0085          |              |                 |
|                  | ECR9 + NeuroD4      | 0.021           |              |                 |
| <b>Figure 5c</b> | ECR65 + Nhlh1       | 0.046           |              |                 |
|                  | ECR9 + NeuroD1      | 0.0137          |              |                 |
| <b>Figure 5d</b> | ECR9 + NeuroD4      | 0.01            |              |                 |
|                  | ECR9 + NeuroG2      | 0.0164          |              |                 |
| <b>Figure 7a</b> | Nhlh1 Vsx2 + GFP    |                 |              | 0.035           |
|                  | ECR9 + NeuroD1 Otx2 | 0.0245          |              |                 |
|                  | NeuroD1 Vsx2 + GFP  | 0.0287          |              |                 |
|                  | ECR9 + NeuroG2 Otx2 | 0.0098          |              |                 |
|                  | ECR9 + NeuroD4 Otx2 | 0.0069          |              |                 |
|                  | NeuroD4 Vsx2 + GFP  | 0.037           |              |                 |

787

### 788 **References**

- 789 Afgan, E., Baker, D., Batut, B., van den Beek, M., Bouvier, D., Cech, M., Chilton, J., Clements, D.,  
790 Coraor, N., Grüning, B.A., et al. (2018). The Galaxy platform for accessible, reproducible and  
791 collaborative biomedical analyses: 2018 update. *Nucleic Acids Res.* *46*, W537–W544.
- 792 Akagi, T., Inoue, T., Miyoshi, G., Bessho, Y., Takahashi, M., Lee, J.E., Guillemot, F., and  
793 Kageyama, R. (2004). Requirement of Multiple Basic Helix-Loop-Helix Genes for Retinal  
794 Neuronal Subtype Specification. *J. Biol. Chem.* *279*, 28492–28498.
- 795 Bailey, T.L., and Elkan, C. (1994). Fitting a Mixture Model By Expectation Maximization To  
796 Discover Motifs In Biopolymer. *Proc. Int. Conf. Intell. Syst. Mol. Biol.* *2*, 28–36.
- 797 Billings, N.A., Emerson, M.M., and Cepko, C.L. (2010). Analysis of thyroid response element  
798 activity during retinal development. *PloS One* *5*, e13739.
- 799 Blankenberg, D., Gordon, A., Von Kuster, G., Coraor, N., Taylor, J., and Nekrutenko, A. (2010).  
800 Manipulation of FASTQ data with Galaxy. *Bioinformatics* *26*, 1783–1785.
- 801 Buenaventura, D.F., Ghinia-Tegla, M.G., and Emerson, M.M. (2018). Fate-restricted retinal  
802 progenitor cells adopt a molecular profile and spatial position distinct from multipotent  
803 progenitor cells. *Dev. Biol.* *443*, 35–49.
- 804 Buenrostro, J.D., Giresi, P.G., Zaba, L.C., Chang, H.Y., and Greenleaf, W.J. (2013). Transposition  
805 of native chromatin for fast and sensitive epigenomic profiling of open chromatin, DNA-binding  
806 proteins and nucleosome position. *Nat. Methods* *10*, 1213–1218.
- 807 Cepko, C.L. (1999). The roles of intrinsic and extrinsic cues and bHLH genes in the determination  
808 of retinal cell fates. *Curr. Opin. Neurobiol.* *9*, 37–46.
- 809 Dennis, D.J., Han, S., and Schuurmans, C. (2019). bHLH transcription factors in neural  
810 development, disease, and reprogramming. *Brain Res.* *1705*, 48–65.
- 811 Emerson, M.M., Surzenko, N., Goetz, J.J., Trimarchi, J., and Cepko, C.L. (2013). *Otx2* and  
812 *Onecut1* Promote the Fates of Cone Photoreceptors and Horizontal Cells and Repress Rod  
813 Photoreceptors. *Dev. Cell* *26*, 59–72.
- 814 Fekete, D.M., Perez-Miguelsanz, J., Ryder, E.F., and Cepko, C.L. (1994). Clonal Analysis in the  
815 Chicken Retina Reveals Tangential Dispersion of Clonally Related Cells. *Dev. Biol.* *166*, 666–682.
- 816 Ghinia-Tegla, M.G., Buenaventura, D.F., Kim, D.Y., Thakurdin, C., Gonzalez, K.C., and Emerson,  
817 M.M. (2019). Single cell profiling of CRISPR/Cas9-induced OTX2 deficient retinas reveals fate  
818 switch from restricted progenitors. *BioRxiv* 538710.
- 819 Gordân, R., Shen, N., Dror, I., Zhou, T., Horton, J., Rohs, R., and Bulyk, M.L. (2013). Genomic  
820 regions flanking E-box binding sites influence DNA binding specificity of bHLH transcription  
821 factors through DNA shape. *Cell Rep.* *3*, 1093–1104.

- 822 Gupta, S., Stamatoyannopoulos, J.A., Bailey, T.L., and Noble, W. (2007). Quantifying similarity  
823 between motifs. *Genome Biol.* *8*, R24.
- 824 Hafler, B.P., Surzenko, N., Beier, K.T., Punzo, C., Trimarchi, J.M., Kong, J.H., and Cepko, C.L.  
825 (2012). Transcription factor Olig2 defines subpopulations of retinal progenitor cells biased  
826 toward specific cell fates. *Proc. Natl. Acad. Sci.* *109*, 7882–7887.
- 827 Hatakeyama, J., and Kageyama, R. (2004). Retinal cell fate determination and bHLH factors.  
828 *Semin. Cell Dev. Biol.* *15*, 83–89.
- 829 Hufnagel, R.B., Le, T.T., Riesenberger, A.L., and Brown, N.L. (2010). Neurog2 controls the leading  
830 edge of neurogenesis in the mammalian retina. *Dev. Biol.* *340*, 490–503.
- 831 Jean-Charles, N., Buenaventura, D.F., and Emerson, M.M. (2018). Identification and  
832 characterization of early photoreceptor cis-regulatory elements and their relation to *OneCut1*.  
833 *Neural Develop.* *13*, 26.
- 834 Kent, W.J. (2002). BLAT—The BLAST-Like Alignment Tool. *Genome Res.* *12*, 656–664.
- 835 Kent, W.J., Sugnet, C.W., Furey, T.S., Roskin, K.M., Pringle, T.H., Zahler, A.M., and Haussler, and  
836 D. (2002). The Human Genome Browser at UCSC. *Genome Res.* *12*, 996–1006.
- 837 Kent, W.J., Zweig, A.S., Barber, G., Hinrichs, A.S., and Karolchik, D. (2010). BigWig and BigBed:  
838 enabling browsing of large distributed datasets. *Bioinformatics* *26*, 2204–2207.
- 839 Langmead, B., Trapnell, C., Pop, M., and Salzberg, S.L. (2009). Ultrafast and memory-efficient  
840 alignment of short DNA sequences to the human genome. *Genome Biol.* *10*, R25.
- 841 Li, C.-M., Yan, R.-T., and Wang, S.-Z. (1999). Misexpression of *cNSCL1* Disrupts Retinal  
842 Development. *Mol. Cell. Neurosci.* *14*, 17–27.
- 843 Li, H., Handsaker, B., Wysoker, A., Fennell, T., Ruan, J., Homer, N., Marth, G., Abecasis, G., and  
844 Durbin, R. (2009). The Sequence Alignment/Map format and SAMtools. *Bioinformatics* *25*,  
845 2078–2079.
- 846 Liu, H., Etter, P., Hayes, S., Jones, I., Nelson, B., Hartman, B., Forrest, D., and Reh, T.A. (2008).  
847 NeuroD1 Regulates Expression of Thyroid Hormone Receptor  $\beta 2$  and Cone Opsins in the  
848 Developing Mouse Retina. *J. Neurosci.* *28*, 749–756.
- 849 Madeira, F., Park, Y.M., Lee, J., Buso, N., Gur, T., Madhusoodanan, N., Basutkar, P., Tivey,  
850 A.R.N., Potter, S.C., Finn, R.D., et al. (2019). The EMBL-EBI search and sequence analysis tools  
851 APIs in 2019. *Nucleic Acids Res.* *47*, W636–W641.
- 852 Mao, C.-A., Cho, J.-H., Wang, J., Gao, Z., Pan, P., Tsai, W.-W., Frishman, L.J., and Klein, W.H.  
853 (2013). Reprogramming amacrine and photoreceptor progenitors into retinal ganglion cells by  
854 replacing *Neurod1* with *Atoh7*. *Development* *140*, 541–551.

- 855 Matsuda, T., and Cepko, C.L. (2004). Electroporation and RNA interference in the rodent retina  
856 in vivo and in vitro. *Proc. Natl. Acad. Sci. U. S. A.* *101*, 16–22.
- 857 Maurer, K.A., Kowalchuk, A., Shoja-Taheri, F., and Brown, N.L. (2018). Integral bHLH factor  
858 regulation of cell cycle exit and RGC differentiation. *Dev. Dyn.* *247*, 965–975.
- 859 Nadadur, R.D., Perez-Cervantes, C., Lonfat, N., Smith, L.A., Hughes, A.E.O., Wang, S., Corbo, J.C.,  
860 Cepko, C., and Moskowitz, I.P. (2019). Enhancer transcription identifies cis-regulatory elements  
861 for photoreceptor cell types. *BioRxiv* 513598.
- 862 Nishida, A., Furukawa, A., Koike, C., Tano, Y., Aizawa, S., Matsuo, I., and Furukawa, T. (2003).  
863 *Otx2* homeobox gene controls retinal photoreceptor cell fate and pineal gland development.  
864 *Nat. Neurosci.* *6*, 1255–1263.
- 865 Ovcharenko, I., Nobrega, M.A., Loots, G.G., and Stubbs, L. (2004). ECR Browser: a tool for  
866 visualizing and accessing data from comparisons of multiple vertebrate genomes. *Nucleic Acids*  
867 *Res.* *32*, W280–286.
- 868 Rompani, S.B., and Cepko, C.L. (2008). Retinal progenitor cells can produce restricted subsets of  
869 horizontal cells. *Proc. Natl. Acad. Sci. U. S. A.* *105*, 192–197.
- 870 Sapkota, D., Chintala, H., Wu, F., Fliesler, S.J., Hu, Z., and Mu, X. (2014). *Onecut1* and *Onecut2*  
871 redundantly regulate early retinal cell fates during development. *Proc. Natl. Acad. Sci.* *111*,  
872 E4086–E4095.
- 873 Schick, E., McCaffery, S.D., Keblish, E.E., Thakurdin, C., and Emerson, M.M. (2019). Lineage  
874 tracing analysis of cone photoreceptor associated cis-regulatory elements in the developing  
875 chicken retina. *Sci. Rep.* *9*, 1–14.
- 876 Schindelin, J., Arganda-Carreras, I., Frise, E., Kaynig, V., Longair, M., Pietzsch, T., Preibisch, S.,  
877 Rueden, C., Saalfeld, S., Schmid, B., et al. (2012). Fiji: an open-source platform for biological-  
878 image analysis. *Nat. Methods* *9*, 676–682.
- 879 Suzuki, S.C., Bleckert, A., Williams, P.R., Takechi, M., Kawamura, S., and Wong, R.O.L. (2013).  
880 Cone photoreceptor types in zebrafish are generated by symmetric terminal divisions of  
881 dedicated precursors. *Proc. Natl. Acad. Sci. U. S. A.* *110*, 15109–15114.
- 882 Trimarchi, J.M., Harpavat, S., Billings, N.A., and Cepko, C.L. (2008). Thyroid hormone  
883 components are expressed in three sequential waves during development of the chick retina.  
884 *BMC Dev. Biol.* *8*, 101.
- 885 Turner, D.L., and Cepko, C.L. (1987). A common progenitor for neurons and glia persists in rat  
886 retina late in development. *Nature* *328*, 131–136.
- 887 Wang, J.C.-C., and Harris, W.A. (2005). The role of combinational coding by homeodomain and  
888 bHLH transcription factors in retinal cell fate specification. *Dev. Biol.* *285*, 101–115.

- 889 Wang, S., Sengel, C., Emerson, M.M., and Cepko, C.L. (2014). A gene regulatory network  
890 controls the binary fate decision of rod and bipolar cells in the vertebrate retina. *Dev. Cell* *30*,  
891 513–527.
- 892 Wong, L.L., and Rapaport, D.H. (2009). Defining retinal progenitor cell competence in *Xenopus*  
893 *laevis* by clonal analysis. *Development* *136*, 1707–1715.
- 894 Wu, F., Li, R., Umino, Y., Kaczynski, T.J., Sapkota, D., Li, S., Xiang, M., Fliesler, S.J., Sherry, D.M.,  
895 Gannon, M., et al. (2013). *Onecut1* Is Essential for Horizontal Cell Genesis and Retinal Integrity.  
896 *J. Neurosci.* *33*, 13053–13065.
- 897 Yan, R.-T., and Wang, S.-Z. (1998). *neuroD* induces photoreceptor cell overproduction in vivo  
898 and de novo generation in vitro. *J. Neurobiol.* *36*, 485–496.
- 899 Young, R.W. (1985). Cell differentiation in the retina of the mouse. *Anat. Rec.* *212*, 199–205.

900

901 **Figure 1. Identification and initial screening for regulatory elements active in E5 chick retinae.**

902 (A) Generation of ATAC-seq libraries of *ThrbCRM1*-positive and *ThrbCRM1*-negative cell  
903 populations. Chick retinae at embryonic day 5 (E5) were electroporated ex vivo with both  
904 *ThrbCRM1::GFP* and *UbiqC::TdT* plasmids and incubated in culture for 18-22 hours prior to  
905 dissociation. Dissociated cells were sorted via FACS into GFP and TdT double-positive cells, and  
906 GFP-negative, TdT-positive cells. Each population was processed for ATAC-seq. (B) Visualization  
907 of aligned ATAC-seq reads to the *galGal5* genome in UCSC Genome Browser in intergenic region  
908 between *Onecut1* and *WDR72* (labelled). Active regulatory elements represented by colored,  
909 labelled lines based on activity level from alkaline phosphatase assay (C) Alkaline phosphatase  
910 reporter assay to screen for regulatory activity. E5 chick retinae were electroporated with  
911 *CRE::AP* plasmids and *CAG::mCherry* plasmids. Empty *Stagia3* vector (No Enhancer) represents  
912 the negative control. Scale bar in the first panel represents 500  $\mu\text{m}$  and applies to all.

913

914 **Figure 2 - Candidate enhancers ECR9 and ECR65 demonstrate specificity to ThrbCRM1(+)**  
915 **population and overlap with mitotic progenitors.** (A) Overlap between CRE::GFP expression  
916 (cyan) and ThrbCRM1::AU1 expression (magenta) 18-22 hours after electroporation. DAPI is  
917 shown in the last column. Electroporated retina is found above the dotted line (B) Overlap of 1  
918 hour EdU-pulsed cells with ECR9::GFP and ECR65::GFP (cyan) 18-22 hours after electroporation.  
919 (C) Quantification of EdU(+) and ThrbCRM1 reporter(+) cells in ECR9::GFP and ECR65::GFP cells.  
920 Percentages of EdU(+) cells were calculated from confocal images by determining the number  
921 of EdU and enhancer::GFP double-positive cells out of all enhancer::GFP-positive cells. Each  
922 point represents a biological replicate with data collected from two images. Percentages of  
923 ThrbCRM1(+) cells were calculated from a flow cytometry assay in which retinae were  
924 electroporated with ECR9::GFP or ECR65::GFP and ThrbCRM1::TdT and the number of GFP/ TdT  
925 double-positive cells of the total GFP(+) population was calculated. Each data point represents a  
926 biological replicate. Error bars represent 95% confidence interval.

927

928 **Figure 3. ECR65(+) and ECR9(+) cells lineage trace to similar cell fates as ThrbCRM1(+)**  
929 **population.** (A) E5 chick retinae were electroporated with enhancer::PhiC31 constructs and  
930 CAG::Bgal as an electroporation control before two days of tissue culture followed by harvest  
931 and immunohistochemistry. (A) Retinal sections were stained with GFP, Bgal, and DAPI. (B)  
932 Markers of early retinal cell types within lineage traced populations. Sections were stained with  
933 the markers Isl1, Visinin, Lim1, and pan-Brn3. Percentages of cells marked by these factors were  
934 calculated out of the total number of electroporated Bgal(+) cells per retinal section. Each point  
935 represents a biological replicate. Error bars represent 95% confidence interval.



936

937 **Figure 4. Deletions and mutations reveal sites important for regulatory activity** E5 chick

938 retinae were electroporated with full length (A) ECR65 or (B) ECR9 driving TdT along truncated  
939 or mutated versions of the enhancers and CAG::IRFP as a co-electroporation control. Retinae  
940 were cultured for 18-22 hours before dissociation and analysis by flow cytometry. Labelled  
941 blocks in (A) and (B) represent the enhancer constructs labelled along the Y-axis. Grey blocks in  
942 (C) and (D) denote putative TF binding sites. Deleted versions of enhancers were oriented in the  
943 expression vector such that the truncated end is farther from the TATA box. Percent of  
944 enhancer activity was calculated as a ratio between the total GFP(+) cells and the total TdT(+)  
945 cells and scaled to the activity of the full-length enhancer. Error bars represent 95% confidence  
946 interval. See Methods section for statistical tests.

947

948 **Figure 5. Effect of overexpression of bHLH factors on regulatory activity of ECR9, ECR65, and**

949 **ThrbCRM1. (A)** E5 retinae were electroporated with Nhlh1, NeuroD1, NeuroD4, NeuroG2 or  
950 Atoh7 under the control of the CAG promoter in combination with ECR65, ECR9 or ThrbCRM1  
951 driving either TdT or GFP. Percentages of ECR9(+), ECR65(+) and ThrbCRM1(+) cells were  
952 calculated out of the total cells marked by co-electroporation control CAG::IRFP. **(B)** Retinae  
953 were electroporated with ECR9::GFP or ECR65::GFP in combination with ThrbCRM1::AU1 and a  
954 CAG::bHLH plasmid. **(C,D)** Comparison of the effect of bHLH overexpression on mutant and WT  
955 versions of ECR9 and ECR65. Percentages were calculated out of total number of CAG::IRFP(+)  
956 cells. Percentages of WT enhancer(+) cells in the control condition were scaled to 100% for C, D.  
957 Percent of enhancer(+) cells in the empty CAG vector control condition were normalized to

958 100% for A. Error bars represent 95% confidence interval. In all graphs, each datapoint  
959 represents a biological replicate. See Methods for statistical tests  
960  
961 **Figure 6. Onset of ECR9 and ECR65 activity compared to ThrbCRM1** (A,B) E5 retinæ were  
962 electroporated with ThrbCRM1::TdT and either ThrbCRM1::GFP, ECR65::GFP or ECR9::GFP and  
963 cultured for 8 hours before harvest. Immunohistochemistry was used to amplify GFP and TdT  
964 signal. Yellow arrow in (B) indicates a cell that is ThrbCRM1::AU1(-), ECR9::GFP(+), Vsx2(+). (C)  
965 E5 retinæ electroporated with ECR9::GFP and ThrbCRM1::TdT were cultured for 8 hours and  
966 pulsed with EdU from hour 7-8. Yellow arrow indicates a cell that is ECR9::GFP(+)  
967 ThrbCRM1::AU1(-) EdU(+). White arrow indicates a cell that is ECR9::GFP(+) ThrbCRM1::AU1(-)  
968 EdU(-). Scale bars in A, B, and C represent 50 µm and apply to all panels. Scale bars in B and C  
969 insets represent 20 µm and apply to all panels.

970  
971 **Figure 7. Co-localization of bHLH-induced activity of ECR9 and ECR65 with early retinal**  
972 **development markers.** E5 retinas were electroporated with ECR9::GFP or ECR65::GFP and their  
973 corresponding bHLH factors and cultured for 18-22 hours before harvest and  
974 immunohistochemistry. (A) Cell quantitation derived from confocal images of retinas stained  
975 for ECR9::GFP (enhancer), co-electroporation marker Bgal, and either Vsx2 or Otx2. Percentages  
976 of Otx2(+) or Vsx2(+) cells as well as GFP(+)Otx2(+) or GFP(+)Vsx2(+) cells were calculated out of  
977 the total number of Bgal(+) cells. Error bars represent 95% CI (B) Same as for (A) but for  
978 ECR65::GFP. (C) Confocal images of retinas were stained for GFP (enhancer), Onecut1 and Vsx2.  
979 Scale bar represents 50 µm.

**Figure 8. Model of ECR9 and ECR65 roles in cone/HC regulatory network.**

(A) Cell populations with ECR9 and ECR65 activity in relation to populations marked by previously published elements and OC1-associated elements reported here. Vsx2 ECR4 is active in the multipotent RPC population, whereas OC1 ECR9, OC1 ECR65, ThrbCRM1, and ThrbICR are all active in fate-restricted RPC populations. (B) Molecular events upstream and downstream of ECR9 and ECR65 activity. Multipotent RPCs give rise ultimately to RPC[CH]s, which corresponds to a down-regulation of Vsx2 and an upregulation of OC1 and Otx2. The bHLH factors that are sufficient to activate ECR9 and ECR65 reporter expression are shown.

# Figure 1

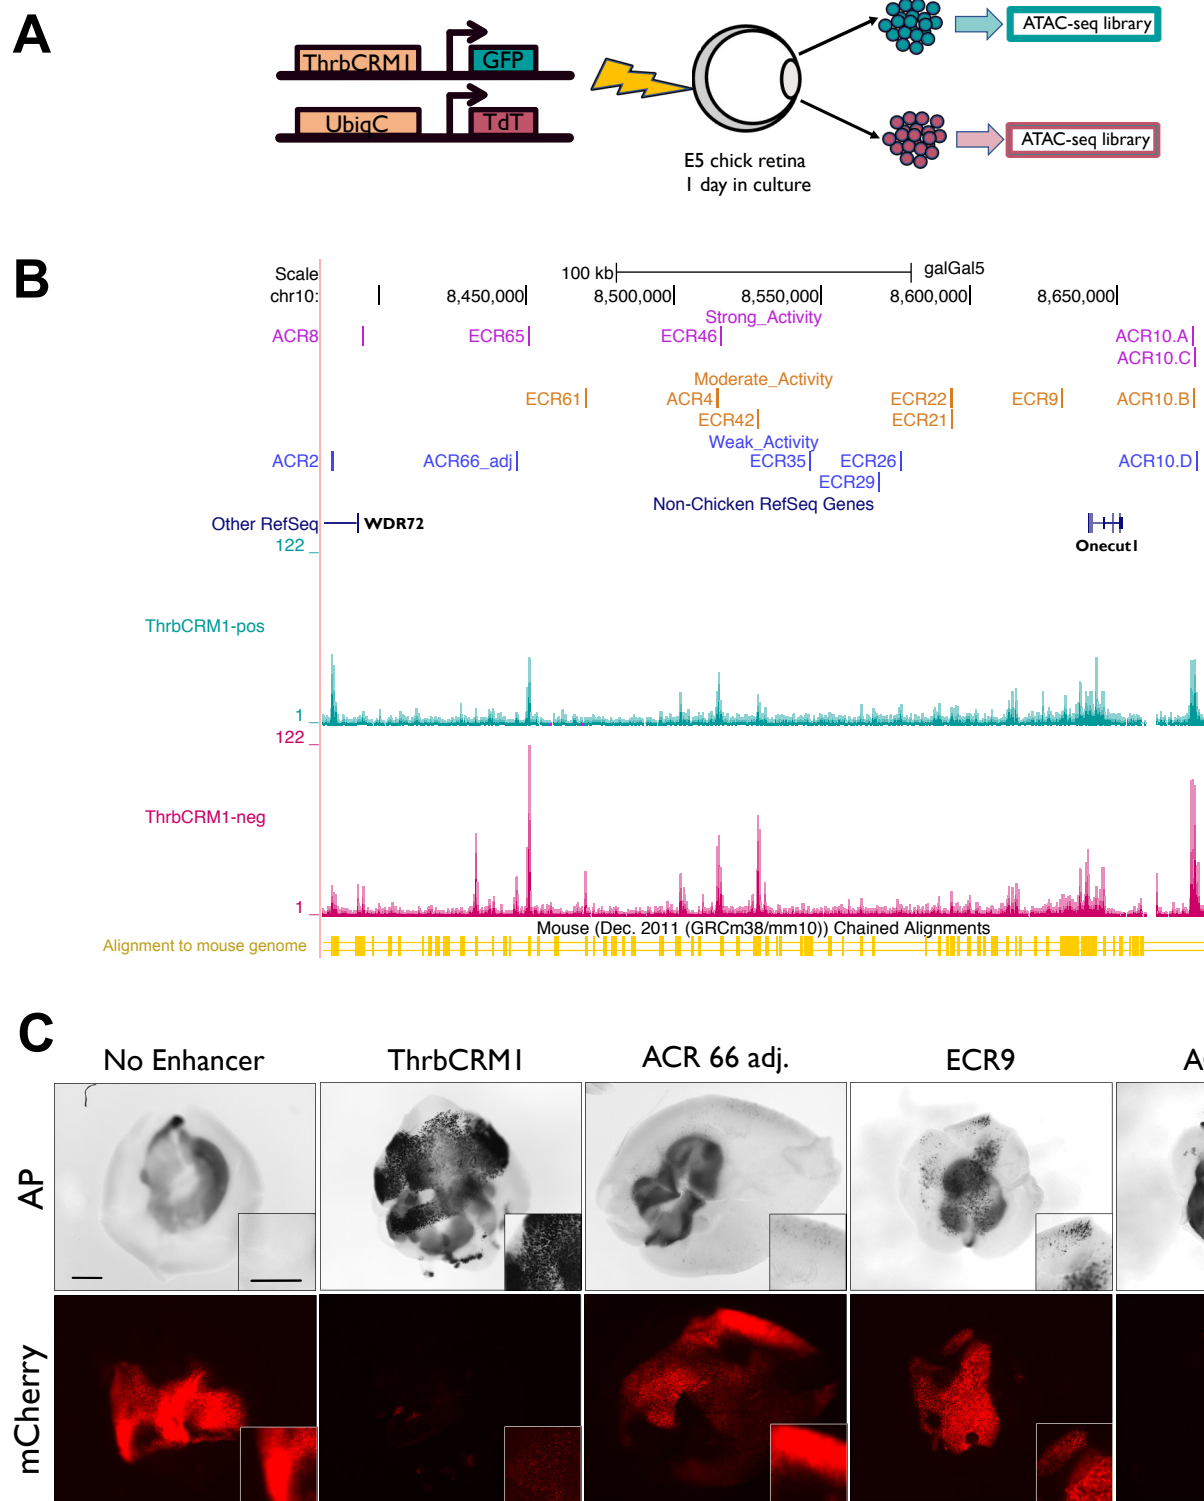

# Figure 2

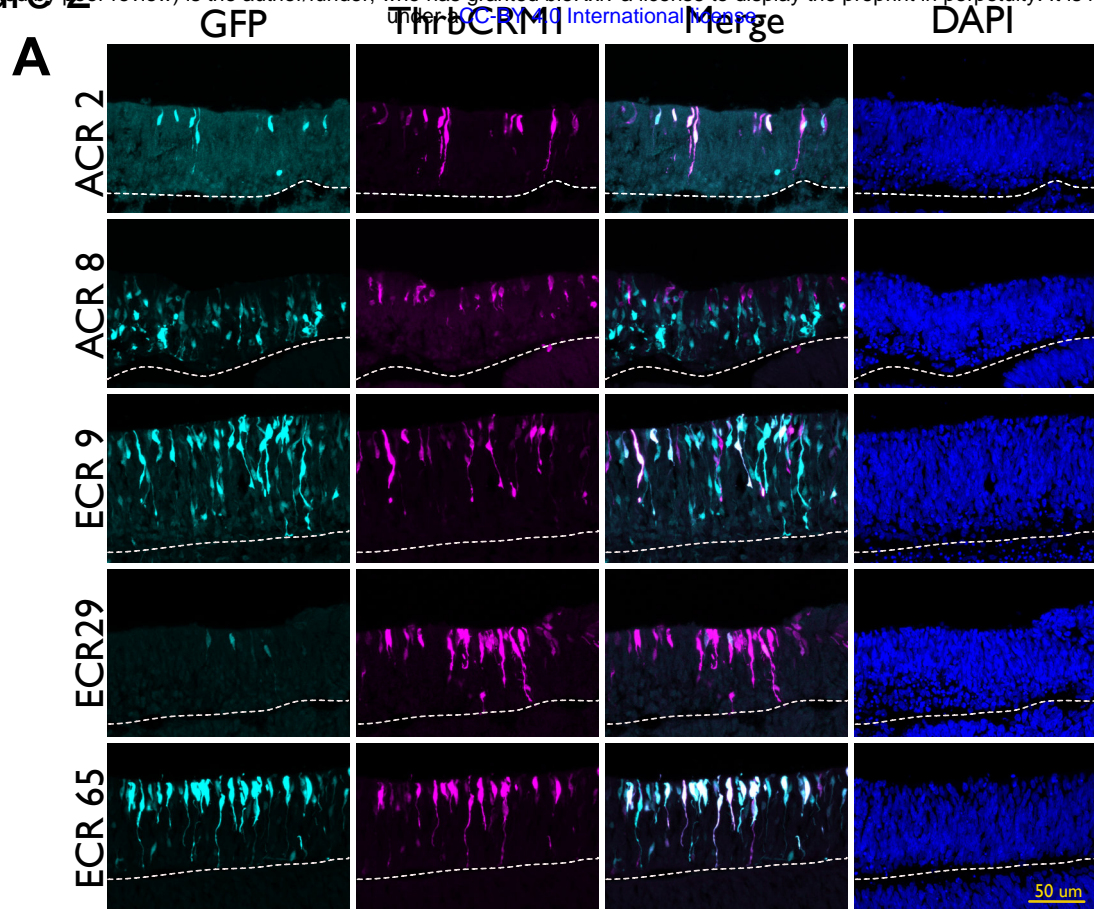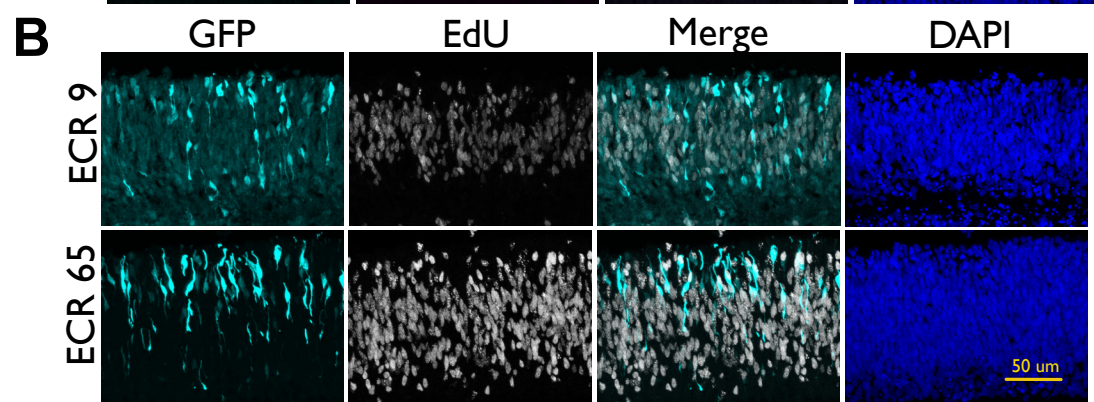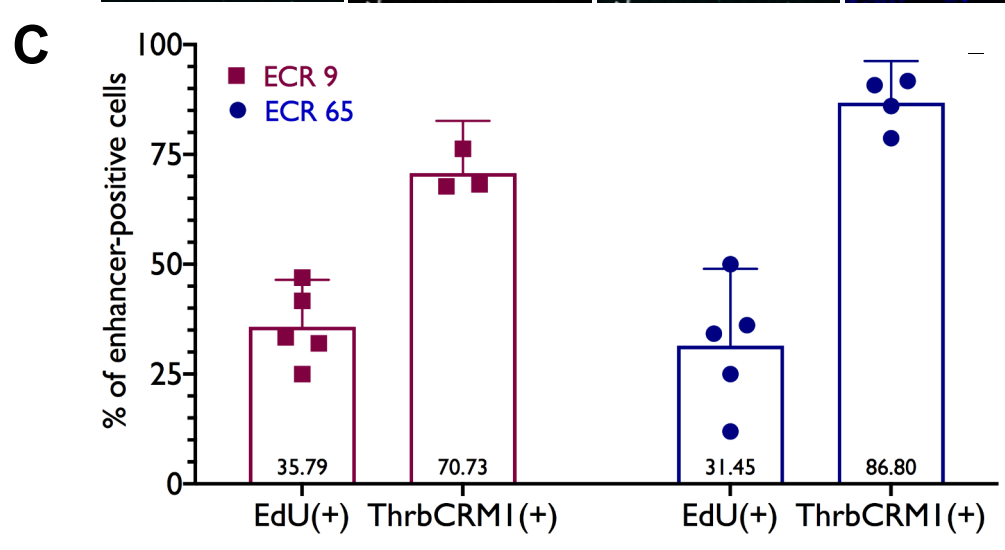



# Figure 3

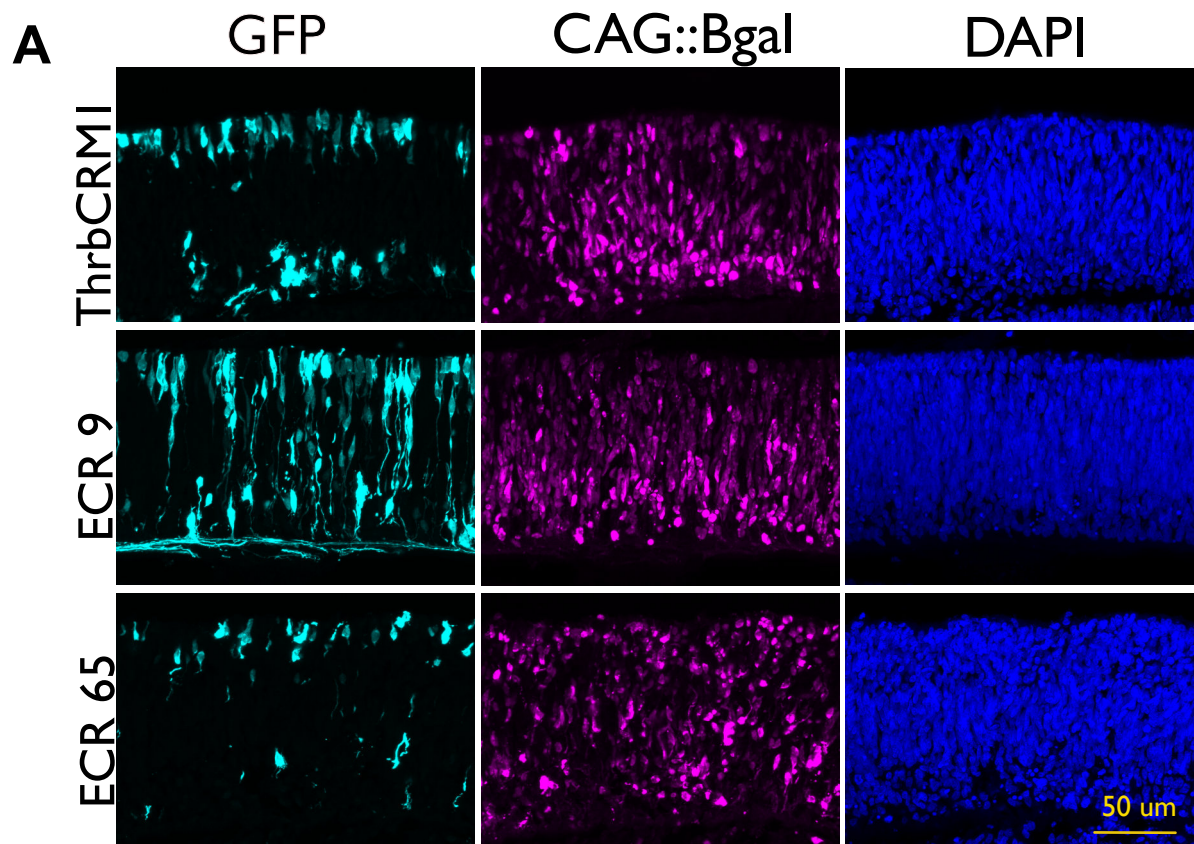

**B**

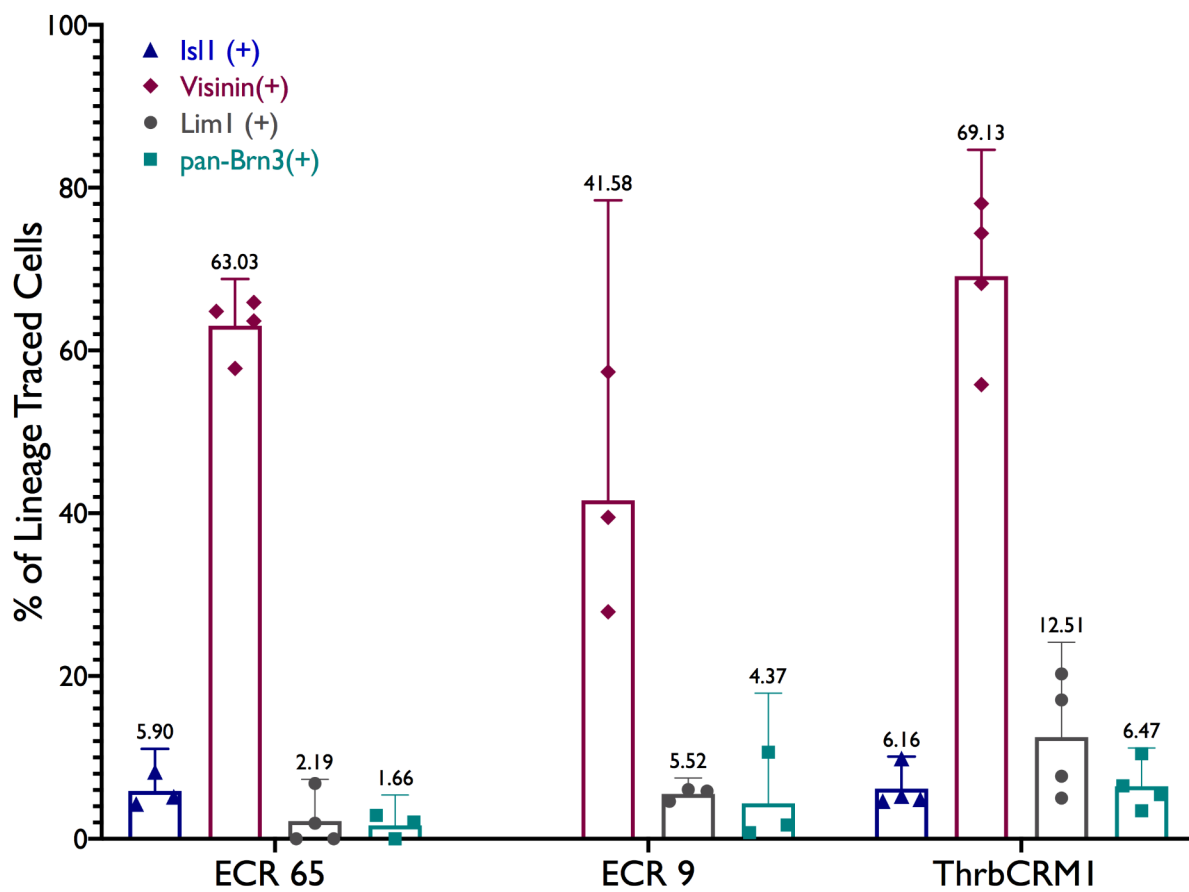

## Figure 4

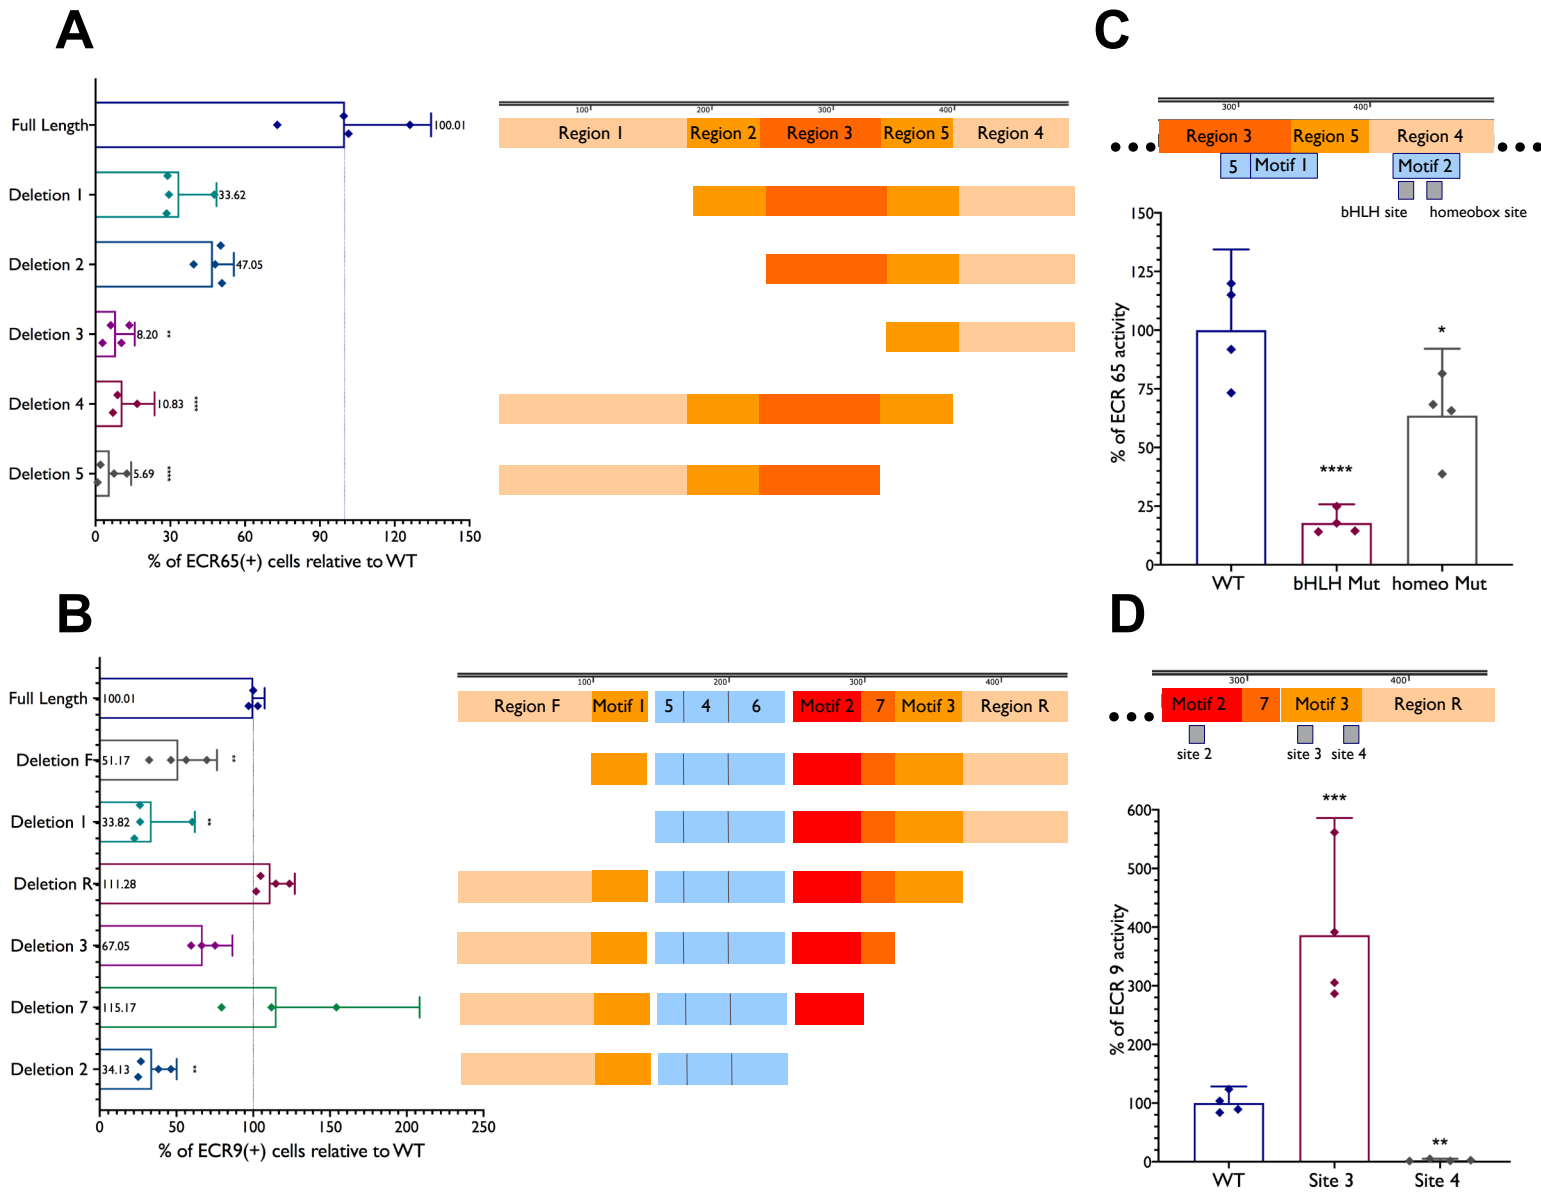

## Figure 5

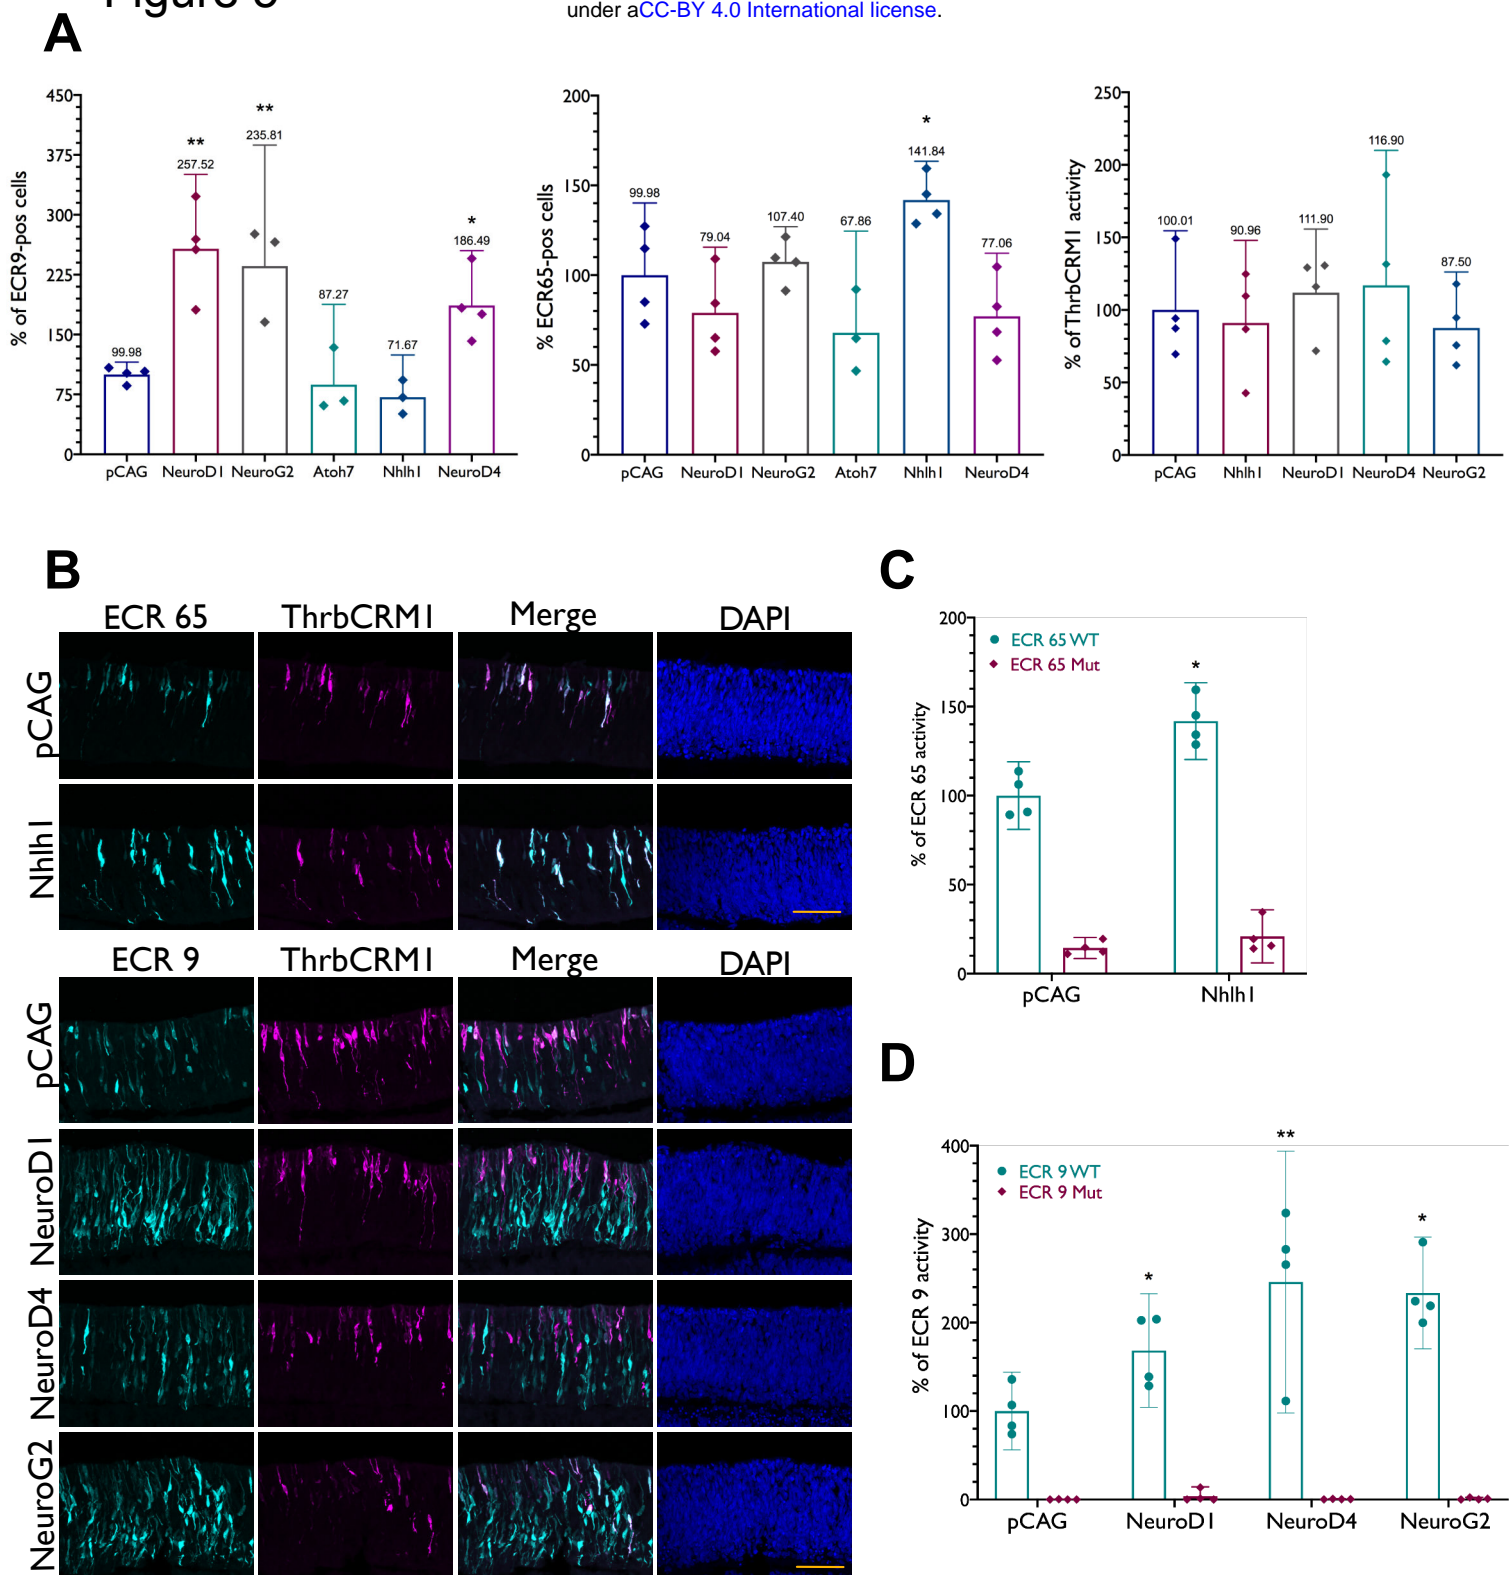



Figure 6

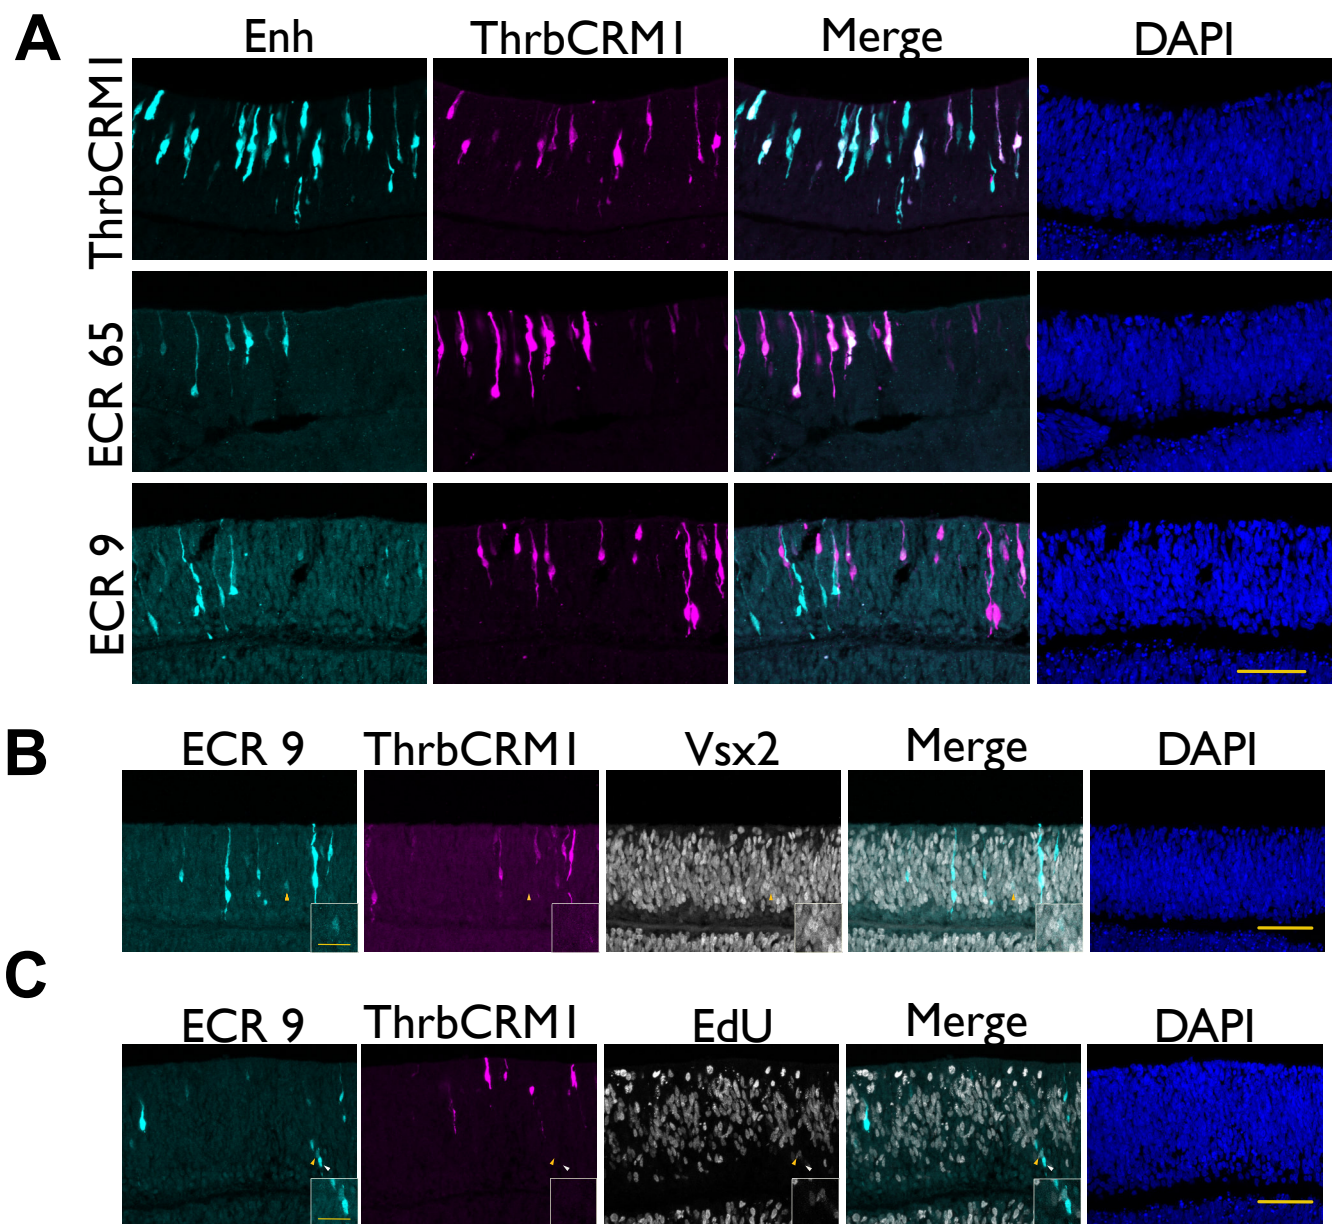

## Figure 7

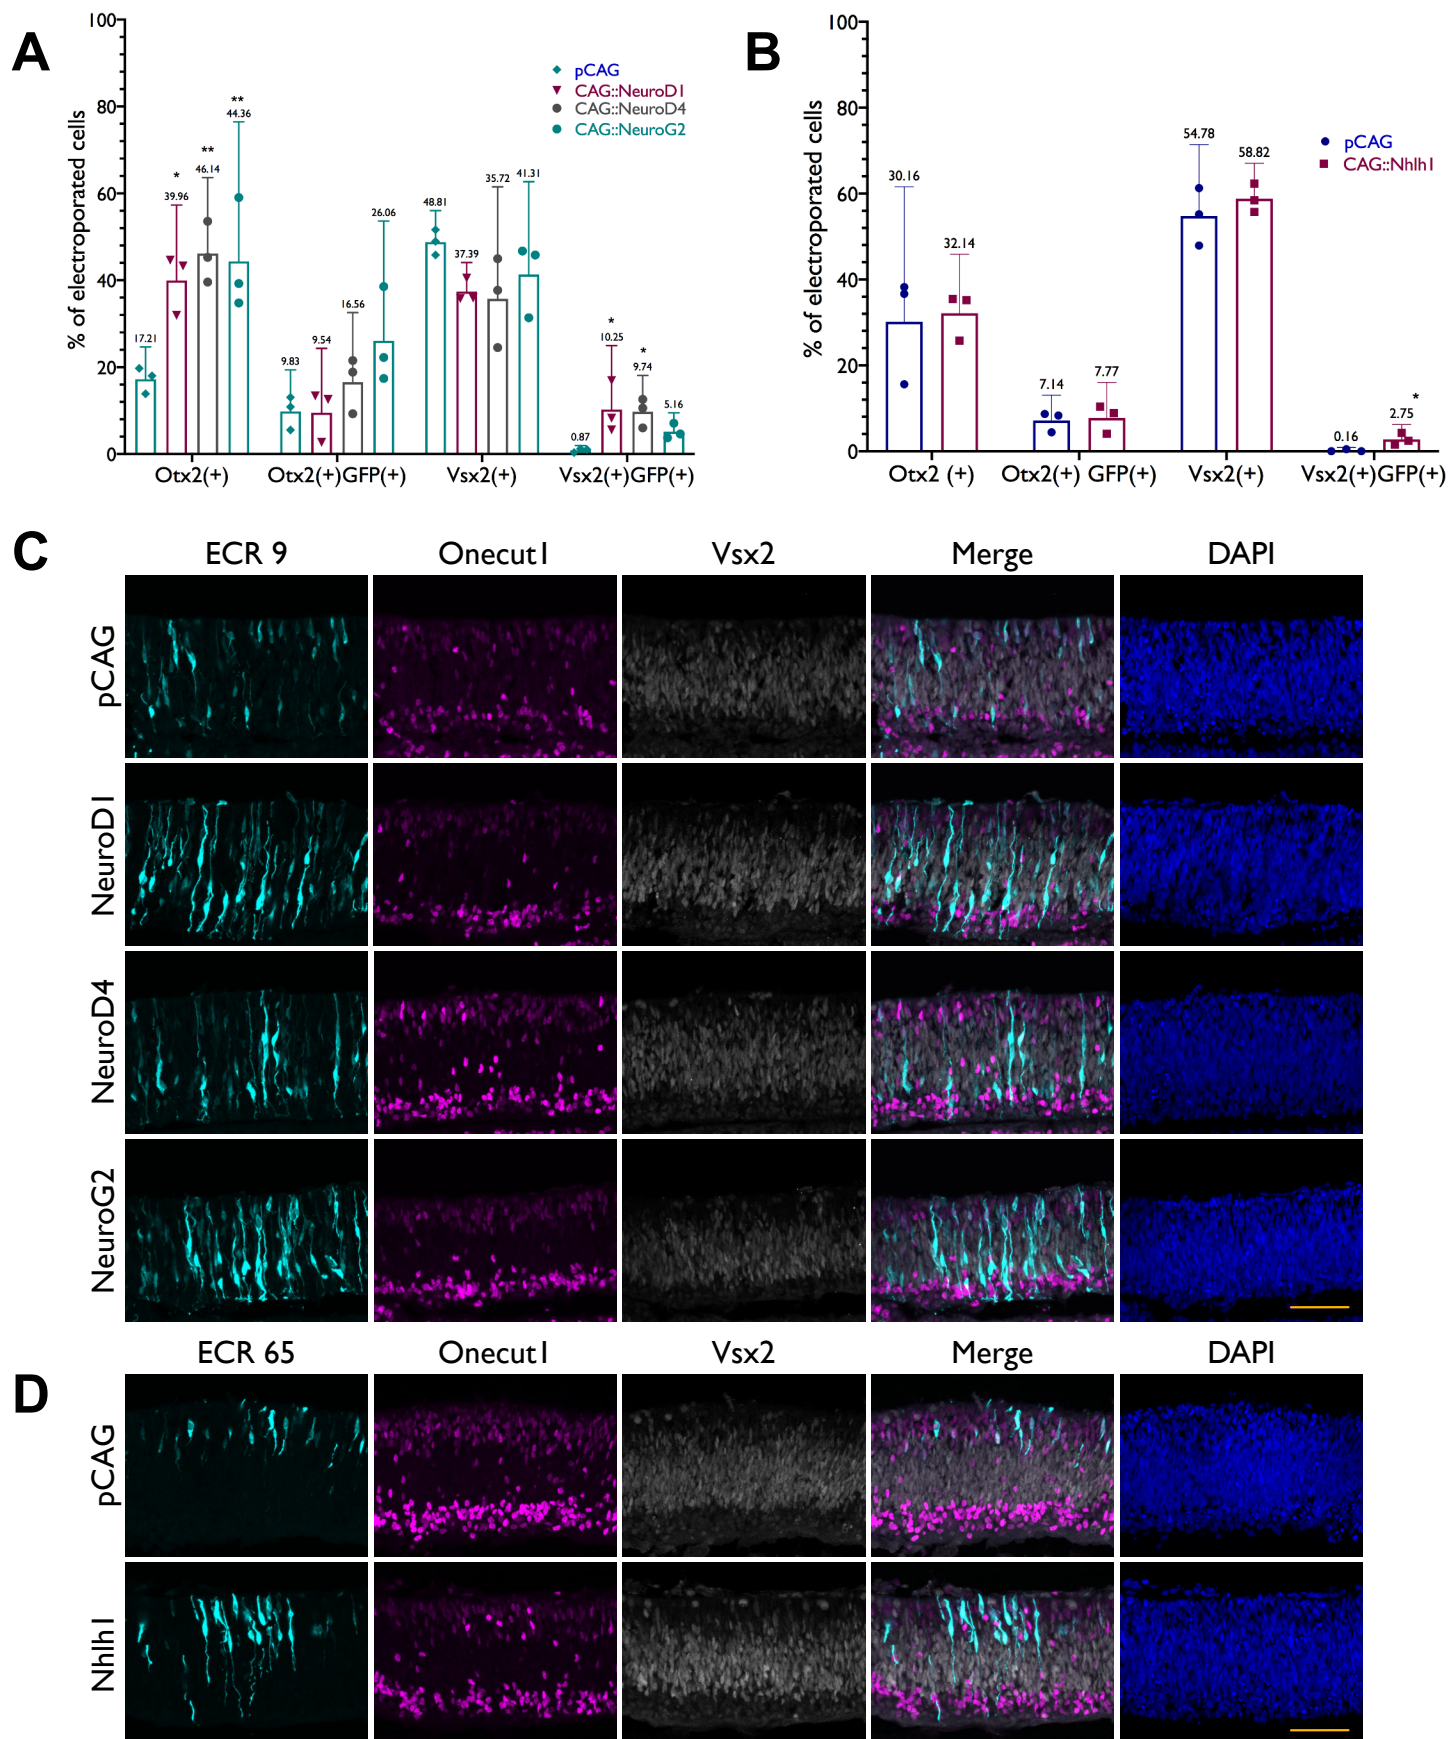

## Figure 8

**A**

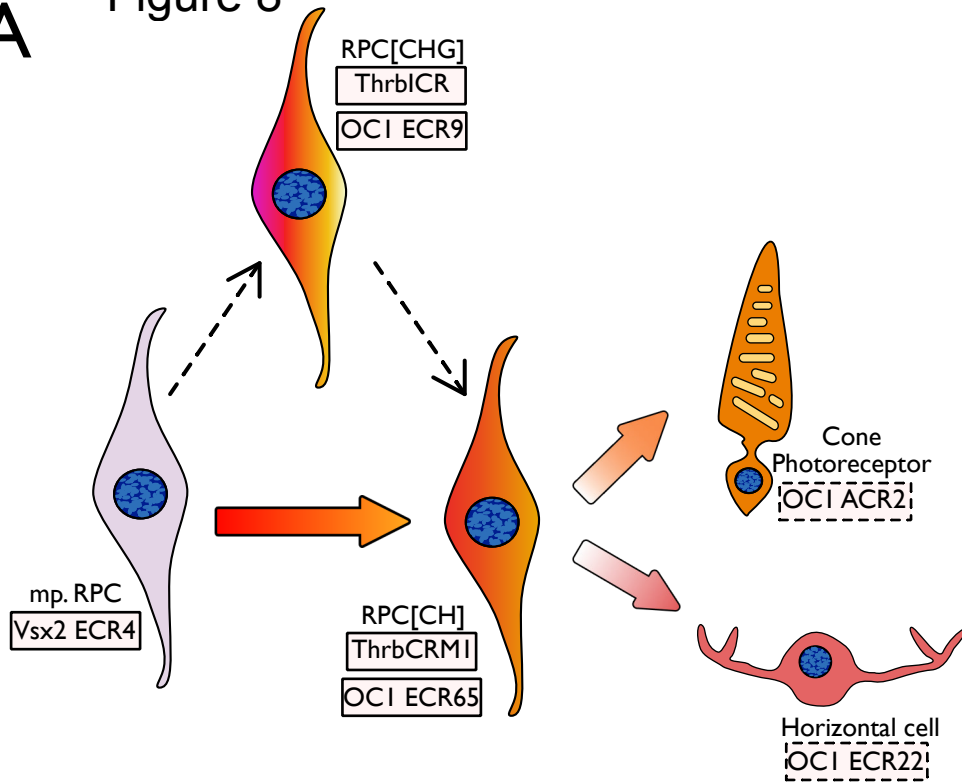

**B**

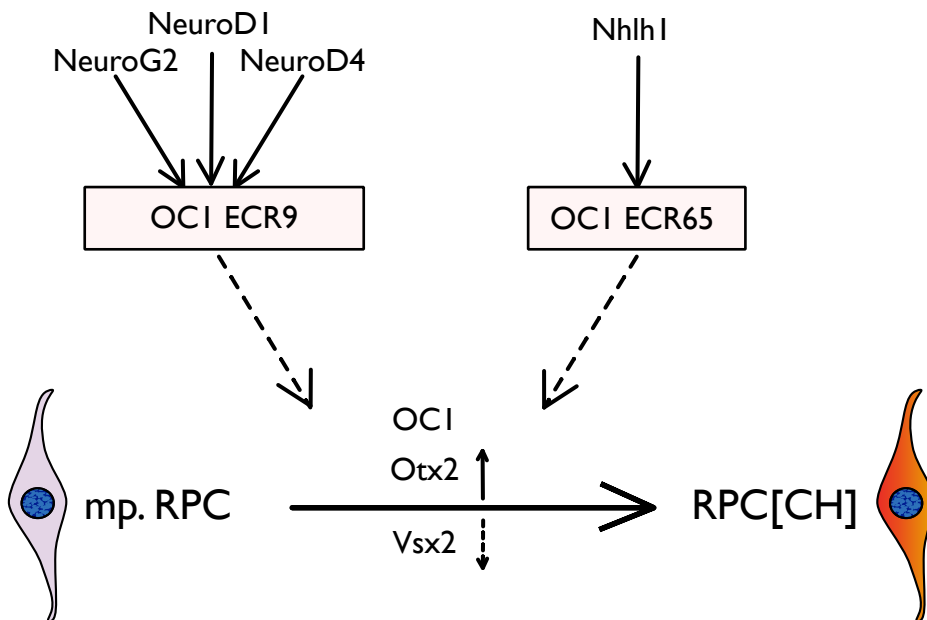

Source: https://www.biorxiv.org/content/10.1101/854778v2.full.pdf
